# Supplementary material
Source: Elsevier journal article supplement (https://www.sciencedirect.com/science/article/pii/S2530064421000717)
Supplement: mmc1 [file S2530064421000717:mmc1.xlsx]

## Sheet: Amazon
Bio region	Species	Feeding Habits	Land cover	Present	Future	Projections	Forecasted
Amazonia	Ametrida.centurio	frugivore	specialist	10266	4062	-6204	contraction
Amazonia	Anoura.luismanueli	nectarivore	generalist	104	28	-76	contraction
Amazonia	Artibeus.aequatorialis	frugivore	specialist	242	178	-64	contraction
Amazonia	Artibeus.concolor	frugivore	specialist	11953	6700	-5253	contraction
Amazonia	Artibeus.fraterculus	frugivore	generalist	76	23	-53	contraction
Amazonia	Artibeus.lituratus	frugivore	generalist	18516	16014	-2502	contraction
Amazonia	Artibeus.obscurus	frugivore	generalist	18345	11393	-6952	contraction
Amazonia	Carollia.benkeithi	frugivore	specialist	3264	88	-3176	contraction
Amazonia	Carollia.brevicauda	frugivore	generalist	20747	15733	-5014	contraction
Amazonia	Carollia.manu	frugivore	specialist	10	1	-9	contraction
Amazonia	Carollia.perspicillata	frugivore	generalist	17359	8415	-8944	contraction
Amazonia	Centronycteris.maximiliani	insectivore	specialist	9793	7923	-1870	contraction
Amazonia	Chiroderma.trinitatum	frugivore	generalist	16154	6432	-9722	contraction
Amazonia	Chiroderma.villosum	frugivore	specialist	16923	7879	-9044	contraction
Amazonia	Choeroniscus.periosus	nectarivore	specialist	144	52	-92	contraction
Amazonia	Chrotopterus.auritus	carnivore	generalist	16932	16050	-882	contraction
Amazonia	Cormura.brevirostris	insectivore	specialist	15797	5796	-10001	contraction
Amazonia	Cynomops.abrasus	insectivore	specialist	15982	7239	-8743	contraction
Amazonia	Cynomops.milleri	insectivore	specialist	4603	3062	-1541	contraction
Amazonia	Cynomops.paranus	insectivore	specialist	12734	8751	-3983	contraction
Amazonia	Cynomops.planirostris	insectivore	specialist	15207	8426	-6781	contraction
Amazonia	Dermanura.anderseni	frugivore	generalist	8906	7857	-1049	contraction
Amazonia	Dermanura.gnoma	frugivore	generalist	16008	12912	-3096	contraction
Amazonia	Dermanura.rava	frugivore	specialist	382	68	-314	contraction
Amazonia	Dermanura.rosenbergi	frugivore	specialist	203	39	-164	contraction
Amazonia	Desmodus.rotundus	sanguivore	generalist	1122	870	-252	contraction
Amazonia	Diaemus.youngi	sanguivore	generalist	17570	15092	-2478	contraction
Amazonia	Diclidurus.albus	insectivore	generalist	17087	14884	-2203	contraction
Amazonia	Diclidurus.ingens	insectivore	generalist	3746	1508	-2238	contraction
Amazonia	Eptesicus.brasiliensis	insectivore	specialist	17454	8796	-8658	contraction
Amazonia	Eptesicus.furinalis	insectivore	generalist	18408	15948	-2460	contraction
Amazonia	Eumops.auripendulus	insectivore	generalist	21460	20596	-864	contraction
Amazonia	Eumops.glaucinus	insectivore	generalist	13126	12069	-1057	contraction
Amazonia	Eumops.hansae	insectivore	generalist	15029	9419	-5610	contraction
Amazonia	Eumops.patagonicus	insectivore	generalist	125	123	-2	contraction
Amazonia	Eumops.trumbulli	insectivore	generalist	11464	8717	-2747	contraction
Amazonia	Furipterus.horrens	insectivore	generalist	14215	6810	-7405	contraction
Amazonia	Gardnerycteris.crenulatum	insectivore	generalist	20945	18030	-2915	contraction
Amazonia	Glossophaga.commissarisi	nectarivore	specialist	6563	6545	-18	contraction
Amazonia	Glossophaga.soricina	nectarivore	generalist	21637	21003	-634	contraction
Amazonia	Glyphonycteris.daviesi	insectivore	specialist	10532	4879	-5653	contraction
Amazonia	Glyphonycteris.sylvestris	insectivore	generalist	12170	8768	-3402	contraction
Amazonia	Histiotus.laephotis	insectivore	specialist	161	1	-160	contraction
Amazonia	Histiotus.velatus	insectivore	generalist	542	432	-110	contraction
Amazonia	Leptonycteris.curasoae	nectarivore	generalist	334	43	-291	contraction
Amazonia	Lionycteris.spurrelli	nectarivore	generalist	17967	15758	-2209	contraction
Amazonia	Lonchophylla.thomasi	nectarivore	generalist	17673	10698	-6975	contraction
Amazonia	Lonchorhina.aurita	insectivore	generalist	17292	15936	-1356	contraction
Amazonia	Lonchorhina.fernandezi	insectivore	generalist	16	3	-13	contraction
Amazonia	Lonchorhina.inusitata	insectivore	generalist	7101	2447	-4654	contraction
Amazonia	Lonchorhina.marinkellei	insectivore	generalist	14	4	-10	contraction
Amazonia	Lophostoma.carrikeri	insectivore	generalist	7667	6974	-693	contraction
Amazonia	Lophostoma.silvicolum	insectivore	specialist	13379	6833	-6546	contraction
Amazonia	Macrophyllum.macrophyllum	insectivore	specialist	17369	8318	-9051	contraction
Amazonia	Mesophylla.macconnelli	frugivore	specialist	16899	5951	-10948	contraction
Amazonia	Micronycteris.hirsuta	insectivore	generalist	13468	11898	-1570	contraction
Amazonia	Micronycteris.megalotis	insectivore	generalist	17993	11979	-6014	contraction
Amazonia	Micronycteris.minuta	insectivore	generalist	18116	15815	-2301	contraction
Amazonia	Micronycteris.schmidtorum	insectivore	specialist	10819	7971	-2848	contraction
Amazonia	Molossops.mattogrossensis	insectivore	generalist	9493	7329	-2164	contraction
Amazonia	Molossus.bondae	insectivore	generalist	849	337	-512	contraction
Amazonia	Molossus.coibensis	insectivore	generalist	14845	10899	-3946	contraction
Amazonia	Molossus.molossus	insectivore	generalist	18417	15848	-2569	contraction
Amazonia	Molossus.rufus	insectivore	generalist	21224	20565	-659	contraction
Amazonia	Myotis.albescens	insectivore	generalist	18553	15690	-2863	contraction
Amazonia	Myotis.dinellii	insectivore	generalist	167	106	-61	contraction
Amazonia	Myotis.nigricans	insectivore	generalist	21411	21061	-350	contraction
Amazonia	Myotis.riparius	insectivore	specialist	17501	8520	-8981	contraction
Amazonia	Natalus.espiritosantensis	insectivore	specialist	5	3	-2	contraction
Amazonia	Noctilio.albiventris	insectivore	generalist	20300	19953	-347	contraction
Amazonia	Nyctinomops.macrotis	insectivore	generalist	18096	15834	-2262	contraction
Amazonia	Peropteryx.kappleri	insectivore	generalist	13559	8483	-5076	contraction
Amazonia	Peropteryx.leucoptera	insectivore	generalist	11177	4815	-6362	contraction
Amazonia	Phylloderma.stenops	omnivore	generalist	19749	12259	-7490	contraction
Amazonia	Phyllostomus.discolor	omnivore	generalist	20855	18050	-2805	contraction
Amazonia	Phyllostomus.elongatus	omnivore	generalist	16165	8791	-7374	contraction
Amazonia	Phyllostomus.hastatus	omnivore	generalist	21463	18296	-3167	contraction
Amazonia	Platyrrhinus.brachycephalus	frugivore	generalist	13588	6883	-6705	contraction
Amazonia	Platyrrhinus.chocoensis	frugivore	specialist	150	35	-115	contraction
Amazonia	Platyrrhinus.fusciventris	frugivore	specialist	5169	1846	-3323	contraction
Amazonia	Platyrrhinus.helleri	frugivore	generalist	20928	19424	-1504	contraction
Amazonia	Platyrrhinus.incarum	frugivore	specialist	5262	3439	-1823	contraction
Amazonia	Platyrrhinus.ismaeli	frugivore	generalist	247	115	-132	contraction
Amazonia	Platyrrhinus.lineatus	frugivore	specialist	633	4	-629	contraction
Amazonia	Platyrrhinus.nigellus	frugivore	specialist	672	172	-500	contraction
Amazonia	Pteronotus.rubiginosus	insectivore	specialist	10258	6472	-3786	contraction
Amazonia	Rhinophylla.alethina	frugivore	specialist	177	31	-146	contraction
Amazonia	Rhinophylla.fischerae	frugivore	specialist	10960	5241	-5719	contraction
Amazonia	Rhinophylla.pumilio	frugivore	specialist	15724	7628	-8096	contraction
Amazonia	Rhynchonycteris.naso	insectivore	generalist	16936	6875	-10061	contraction
Amazonia	Saccopteryx.bilineata	insectivore	generalist	16699	8778	-7921	contraction
Amazonia	Saccopteryx.canescens	insectivore	generalist	14534	10477	-4057	contraction
Amazonia	Saccopteryx.leptura	insectivore	generalist	17994	15249	-2745	contraction
Amazonia	Sphaeronycteris.toxophyllum	frugivore	specialist	7538	4036	-3502	contraction
Amazonia	Sturnira.aratathomasi	frugivore	specialist	118	115	-3	contraction
Amazonia	Sturnira.bidens	frugivore	specialist	647	49	-598	contraction
Amazonia	Sturnira.bogotensis	frugivore	specialist	462	153	-309	contraction
Amazonia	Sturnira.erythromos	frugivore	specialist	1085	768	-317	contraction
Amazonia	Sturnira.lilium	frugivore	specialist	8	1	-7	contraction
Amazonia	Sturnira.luisi	frugivore	specialist	304	125	-179	contraction
Amazonia	Sturnira.magna	frugivore	specialist	2845	2104	-741	contraction
Amazonia	Sturnira.oporaphilum	frugivore	specialist	854	236	-618	contraction
Amazonia	Sturnira.tildae	frugivore	specialist	15896	7533	-8363	contraction
Amazonia	Thyroptera.discifera	insectivore	generalist	11447	3638	-7809	contraction
Amazonia	Thyroptera.tricolor	insectivore	generalist	17855	11647	-6208	contraction
Amazonia	Tonatia.bidens	insectivore	specialist	12	1	-11	contraction
Amazonia	Trachops.cirrhosus	carnivore	generalist	18245	14414	-3831	contraction
Amazonia	Uroderma.bilobatum	frugivore	generalist	18985	16164	-2821	contraction
Amazonia	Uroderma.magnirostrum	frugivore	specialist	16788	6841	-9947	contraction
Amazonia	Vampyriscus.bidens	frugivore	specialist	15244	6444	-8800	contraction
Amazonia	Vampyriscus.brocki	frugivore	specialist	2163	2152	-11	contraction
Amazonia	Vampyriscus.nymphaea	frugivore	specialist	306	67	-239	contraction
Amazonia	Vampyrodes.caraccioli	frugivore	generalist	16298	11993	-4305	contraction
Amazonia	Vampyrum.spectrum	carnivore	specialist	7612	7375	-237	contraction
Amazonia	Anoura.caudifer	nectarivore	specialist	7625	8140	515	expansion
Amazonia	Anoura.aequatoris	nectarivore	specialist	944	1270	326	expansion
Amazonia	Anoura.cultrata	nectarivore	generalist	1274	1747	473	expansion
Amazonia	Anoura.fistulata	nectarivore	specialist	180	290	110	expansion
Amazonia	Anoura.geoffroyi	nectarivore	generalist	6440	12940	6500	expansion
Amazonia	Anoura.latidens	nectarivore	generalist	1340	2656	1316	expansion
Amazonia	Anoura.peruana	nectarivore	generalist	1640	2410	770	expansion
Amazonia	Artibeus.amplus	frugivore	specialist	728	2329	1601	expansion
Amazonia	Artibeus.jamaicensis	frugivore	generalist	145	589	444	expansion
Amazonia	Artibeus.planirostris	frugivore	generalist	12776	13874	1098	expansion
Amazonia	Carollia.castanea	frugivore	generalist	3609	9716	6107	expansion
Amazonia	Centronycteris.centralis	insectivore	specialist	3777	7378	3601	expansion
Amazonia	Centurio.senex	frugivore	generalist	584	4252	3668	expansion
Amazonia	Chiroderma.salvini	frugivore	generalist	4335	5300	965	expansion
Amazonia	Choeroniscus.godmani	nectarivore	generalist	2941	5282	2341	expansion
Amazonia	Choeroniscus.minor	nectarivore	generalist	11008	16060	5052	expansion
Amazonia	Cynomops.greenhalli	insectivore	generalist	8101	8551	450	expansion
Amazonia	Cyttarops.alecto	insectivore	generalist	1520	3146	1626	expansion
Amazonia	Dermanura.bogotensis	frugivore	specialist	481	3809	3328	expansion
Amazonia	Dermanura.cinerea	frugivore	generalist	4978	6936	1958	expansion
Amazonia	Dermanura.glauca	frugivore	generalist	5101	15036	9935	expansion
Amazonia	Dermanura.phaeotis	frugivore	generalist	5130	13080	7950	expansion
Amazonia	Dermanura.tolteca	frugivore	generalist	22	128	106	expansion
Amazonia	Dermanura.watsoni	frugivore	generalist	262	339	77	expansion
Amazonia	Diclidurus.isabella	insectivore	generalist	2491	2598	107	expansion
Amazonia	Diclidurus.scutatus	insectivore	generalist	3549	9372	5823	expansion
Amazonia	Diphylla.ecaudata	sanguivore	generalist	7484	12322	4838	expansion
Amazonia	Enchisthenes.hartii	frugivore	specialist	2908	5194	2286	expansion
Amazonia	Eptesicus.chiriquinus	insectivore	specialist	303	5769	5466	expansion
Amazonia	Eptesicus.diminutus	insectivore	generalist	98	194	96	expansion
Amazonia	Eptesicus.fuscus	insectivore	generalist	17	94	77	expansion
Amazonia	Eumops.bonariensis	insectivore	generalist	2	5	3	expansion
Amazonia	Eumops.dabbenei	insectivore	generalist	1297	8414	7117	expansion
Amazonia	Eumops.delticus	insectivore	specialist	2093	3263	1170	expansion
Amazonia	Eumops.maurus	insectivore	generalist	2886	8273	5387	expansion
Amazonia	Eumops.perotis	insectivore	generalist	11264	13985	2721	expansion
Amazonia	Glossophaga.longirostris	nectarivore	generalist	1703	3512	1809	expansion
Amazonia	Glyphonycteris.behnii	insectivore	generalist	1337	2287	950	expansion
Amazonia	Histiotus.humboldti	insectivore	specialist	241	572	331	expansion
Amazonia	Histiotus.macrotus	insectivore	generalist	14	17	3	expansion
Amazonia	Histiotus.montanus	insectivore	generalist	1419	1654	235	expansion
Amazonia	Lampronycteris.brachyotis	omnivore	generalist	8759	12394	3635	expansion
Amazonia	Lasiurus.blossevillii	insectivore	generalist	20623	20926	303	expansion
Amazonia	Lasiurus.cinereus	insectivore	generalist	1377	2389	1012	expansion
Amazonia	Lasiurus.ega	insectivore	generalist	13914	14330	416	expansion
Amazonia	Lasiurus.egregius	insectivore	specialist	1850	5796	3946	expansion
Amazonia	Lichonycteris.degener	nectarivore	specialist	6052	8781	2729	expansion
Amazonia	Lichonycteris.obscura	nectarivore	generalist	590	1531	941	expansion
Amazonia	Lonchophylla.concava	nectarivore	generalist	268	997	729	expansion
Amazonia	Lonchophylla.handleyi	nectarivore	generalist	212	699	487	expansion
Amazonia	Lonchophylla.orienticollina	nectarivore	specialist	136	2	-134	expansion
Amazonia	Lonchophylla.robusta	nectarivore	generalist	1153	1277	124	expansion
Amazonia	Lonchorhina.orinocensis	insectivore	generalist	541	3103	2562	expansion
Amazonia	Lophostoma.brasiliense	insectivore	generalist	16931	20416	3485	expansion
Amazonia	Micronycteris.brosseti	insectivore	specialist	1311	2061	750	expansion
Amazonia	Micronycteris.microtis	insectivore	generalist	8547	14128	5581	expansion
Amazonia	Mimon.bennettii	insectivore	generalist	5293	10556	5263	expansion
Amazonia	Mimon.cozumelae	insectivore	generalist	365	4749	4384	expansion
Amazonia	Molossops.temminckii	insectivore	generalist	13321	15403	2082	expansion
Amazonia	Molossus.aztecus	insectivore	generalist	2	2554	2552	expansion
Amazonia	Molossus.pretiosus	insectivore	generalist	2784	11838	9054	expansion
Amazonia	Molossus.sinaloae	insectivore	generalist	1263	8058	6795	expansion
Amazonia	Mormoops.megalophylla	insectivore	generalist	681	1354	673	expansion
Amazonia	Mormopterus.kalinowskii	insectivore	generalist	77	163	86	expansion
Amazonia	Myotis.keaysi	insectivore	specialist	2314	5174	2860	expansion
Amazonia	Myotis.oxyotus	insectivore	generalist	2769	4732	1963	expansion
Amazonia	Myotis.simus	insectivore	specialist	4757	6431	1674	expansion
Amazonia	Natalus.mexicanus	insectivore	generalist	27	34	7	expansion
Amazonia	Natalus.tumidirostris	insectivore	generalist	1642	4766	3124	expansion
Amazonia	Noctilio.leporinus	piscivore	generalist	21021	21381	360	expansion
Amazonia	Nyctinomops.aurispinosus	insectivore	generalist	1118	3469	2351	expansion
Amazonia	Nyctinomops.laticaudatus	insectivore	generalist	15220	15808	588	expansion
Amazonia	Peropteryx.macrotis	insectivore	generalist	20505	21049	544	expansion
Amazonia	Peropteryx.pallidoptera	insectivore	specialist	966	2712	1746	expansion
Amazonia	Platalina.genovensium	nectarivore	generalist	112	160	48	expansion
Amazonia	Platyrrhinus.albericoi	nectarivore	specialist	1268	3583	2315	expansion
Amazonia	Platyrrhinus.angustirostris	frugivore	specialist	792	2450	1658	expansion
Amazonia	Platyrrhinus.aurarius	frugivore	specialist	730	800	70	expansion
Amazonia	Platyrrhinus.dorsalis	frugivore	specialist	763	1930	1167	expansion
Amazonia	Platyrrhinus.infuscus	frugivore	generalist	2881	5833	2952	expansion
Amazonia	Platyrrhinus.masu	frugivore	specialist	473	2286	1813	expansion
Amazonia	Platyrrhinus.recifinus	frugivore	generalist	4	7	3	expansion
Amazonia	Platyrrhinus.vittatus	frugivore	specialist	574	3482	2908	expansion
Amazonia	Promops.centralis	insectivore	specialist	5327	8786	3459	expansion
Amazonia	Pteronotus.davyi	insectivore	generalist	3232	5061	1829	expansion
Amazonia	Pteronotus.gymnonotus	insectivore	generalist	4591	6684	2093	expansion
Amazonia	Pteronotus.personatus	insectivore	generalist	3818	5298	1480	expansion
Amazonia	Pygoderma.bilabiatum	frugivore	generalist	165	202	37	expansion
Amazonia	Rhogeessa.io	insectivore	generalist	6602	12700	6098	expansion
Amazonia	Rhogeessa.minutilla	insectivore	generalist	323	500	177	expansion
Amazonia	Scleronycteris.ega	nectarivore	generalist	2507	5215	2708	expansion
Amazonia	Sturnira.ludovici	frugivore	specialist	1001	6838	5837	expansion
Amazonia	Tadarida.brasiliensis	insectivore	generalist	1964	8365	6401	expansion
Amazonia	Tonatia.saurophila	insectivore	generalist	13221	15252	2031	expansion
Amazonia	Trinycteris.nicefori	frugivore	generalist	8463	8665	202	expansion
Amazonia	Vampyressa.melissa	frugivore	specialist	985	2924	1939	expansion
Amazonia	Vampyressa.thyone	frugivore	specialist	7468	8776	1308	expansion
Amazonia	Vampyrodes.major	frugivore	generalist	503	1738	1235	expansion

## Sheet: Atlantic forests
Bio region	Species	Feeding Habits	Land cover	Present	Future	Projections	Forecasted
Atlantic forests	Dryadonycteris.capixaba	nectarivore	specialist	1	0	-1	globally extinct
Atlantic forests	Lonchophylla.mordax	nectarivore	specialist	1	0	-1	globally extinct
Atlantic forests	Artibeus.concolor	frugivore	specialist	1	0	-1	extinct
Atlantic forests	Centronycteris.maximiliani	insectivore	specialist	63	0	-63	extinct
Atlantic forests	Chiroderma.villosum	frugivore	specialist	1	0	-1	extinct
Atlantic forests	Cynomops.planirostris	insectivore	specialist	11	0	-11	extinct
Atlantic forests	Eumops.delticus	insectivore	specialist	19	0	-19	extinct
Atlantic forests	Furipterus.horrens	insectivore	generalist	13	0	-13	extinct
Atlantic forests	Lichonycteris.degener	nectarivore	specialist	63	0	-63	extinct
Atlantic forests	Molossops.mattogrossensis	insectivore	generalist	61	0	-61	extinct
Atlantic forests	Natalus.espiritosantensis	insectivore	specialist	1	0	-1	extinct
Atlantic forests	Rhinophylla.pumilio	frugivore	specialist	67	0	-67	extinct
Atlantic forests	Rhynchonycteris.naso	insectivore	generalist	71	0	-71	extinct
Atlantic forests	Sturnira.tildae	frugivore	specialist	85	0	-85	extinct
Atlantic forests	Uroderma.magnirostrum	frugivore	specialist	61	0	-61	extinct
Atlantic forests	Anoura.caudifer	nectarivore	specialist	402	6	-396	contraction
Atlantic forests	Artibeus.fimbriatus	frugivore	specialist	689	6	-683	contraction
Atlantic forests	Artibeus.lituratus	frugivore	generalist	1476	1409	-67	contraction
Atlantic forests	Artibeus.obscurus	frugivore	generalist	1816	1040	-776	contraction
Atlantic forests	Carollia.perspicillata	frugivore	generalist	673	7	-666	contraction
Atlantic forests	Chrotopterus.auritus	carnivore	generalist	1685	1463	-222	contraction
Atlantic forests	Cynomops.abrasus	insectivore	specialist	174	5	-169	contraction
Atlantic forests	Dermanura.cinerea	frugivore	generalist	976	702	-274	contraction
Atlantic forests	Dermanura.gnoma	frugivore	generalist	257	238	-19	contraction
Atlantic forests	Desmodus.rotundus	sanguivore	generalist	1011	887	-124	contraction
Atlantic forests	Diclidurus.albus	insectivore	generalist	395	348	-47	contraction
Atlantic forests	Diphylla.ecaudata	sanguivore	generalist	1707	1210	-497	contraction
Atlantic forests	Eptesicus.brasiliensis	insectivore	specialist	540	6	-534	contraction
Atlantic forests	Eptesicus.diminutus	insectivore	generalist	1392	1172	-220	contraction
Atlantic forests	Eptesicus.furinalis	insectivore	generalist	1643	1461	-182	contraction
Atlantic forests	Eptesicus.taddeii	insectivore	specialist	67	3	-64	contraction
Atlantic forests	Eumops.patagonicus	insectivore	generalist	158	106	-52	contraction
Atlantic forests	Glyphonycteris.sylvestris	insectivore	generalist	53	6	-47	contraction
Atlantic forests	Lasiurus.blossevillii	insectivore	generalist	3211	3021	-190	contraction
Atlantic forests	Lasiurus.cinereus	insectivore	generalist	1422	1237	-185	contraction
Atlantic forests	Lasiurus.egregius	insectivore	specialist	162	3	-159	contraction
Atlantic forests	Macrophyllum.macrophyllum	insectivore	specialist	440	5	-435	contraction
Atlantic forests	Micronycteris.schmidtorum	insectivore	specialist	118	6	-112	contraction
Atlantic forests	Mimon.bennettii	insectivore	generalist	1777	993	-784	contraction
Atlantic forests	Molossus.molossus	insectivore	generalist	1738	1461	-277	contraction
Atlantic forests	Myotis.albescens	insectivore	generalist	1743	1460	-283	contraction
Atlantic forests	Myotis.izecksohni	insectivore	specialist	65	3	-62	contraction
Atlantic forests	Myotis.levis	insectivore	specialist	537	6	-531	contraction
Atlantic forests	Myotis.riparius	insectivore	specialist	731	6	-725	contraction
Atlantic forests	Myotis.ruber	insectivore	specialist	651	6	-645	contraction
Atlantic forests	Nyctinomops.aurispinosus	insectivore	generalist	327	186	-141	contraction
Atlantic forests	Nyctinomops.laticaudatus	insectivore	generalist	1521	1274	-247	contraction
Atlantic forests	Peropteryx.kappleri	insectivore	generalist	121	7	-114	contraction
Atlantic forests	Phyllostomus.elongatus	omnivore	generalist	154	3	-151	contraction
Atlantic forests	Platyrrhinus.lineatus	frugivore	specialist	666	6	-660	contraction
Atlantic forests	Platyrrhinus.recifinus	frugivore	generalist	1451	1027	-424	contraction
Atlantic forests	Pygoderma.bilabiatum	frugivore	generalist	1462	1298	-164	contraction
Atlantic forests	Saccopteryx.bilineata	insectivore	generalist	154	4	-150	contraction
Atlantic forests	Sturnira.lilium	frugivore	generalist	498	6	-492	contraction
Atlantic forests	Tadarida.brasiliensis	insectivore	generalist	1298	1115	-183	contraction
Atlantic forests	Thyroptera.tricolor	insectivore	generalist	876	665	-211	contraction
Atlantic forests	Tonatia.bidens	omnivore	specialist	421	6	-415	contraction
Atlantic forests	Carollia.brevicauda	frugivore	generalist	99	99	0	stable
Atlantic forests	Diclidurus.scutatus	insectivore	generalist	3	3	0	stable
Atlantic forests	Anoura.geoffroyi	nectarivore	generalist	713	792	79	expansion
Atlantic forests	Artibeus.planirostris	frugivore	generalist	814	1008	194	expansion
Atlantic forests	Chiroderma.doriae	frugivore	generalist	824	1385	561	expansion
Atlantic forests	Choeroniscus.minor	nectarivore	generalist	460	509	49	expansion
Atlantic forests	Cynomops.greenhalli	insectivore	generalist	22	42	20	expansion
Atlantic forests	Diaemus.youngi	sanguivore	generalist	930	1155	225	expansion
Atlantic forests	Eumops.auripendulus	insectivore	generalist	3400	3582	182	expansion
Atlantic forests	Eumops.bonariensis	insectivore	generalist	239	332	93	expansion
Atlantic forests	Eumops.dabbenei	insectivore	generalist	6	1139	1133	expansion
Atlantic forests	Eumops.glaucinus	insectivore	generalist	584	1224	640	expansion
Atlantic forests	Eumops.perotis	insectivore	generalist	623	717	94	expansion
Atlantic forests	Gardnerycteris.crenulatum	insectivore	generalist	483	485	2	expansion
Atlantic forests	Glossophaga.soricina	nectarivore	generalist	2822	2950	128	expansion
Atlantic forests	Histiotus.velatus	insectivore	generalist	693	1232	539	expansion
Atlantic forests	Lasiurus.ega	insectivore	generalist	987	1371	384	expansion
Atlantic forests	Lonchorhina.aurita	insectivore	generalist	352	361	9	expansion
Atlantic forests	Lophostoma.brasiliense	insectivore	generalist	168	251	83	expansion
Atlantic forests	Micronycteris.hirsuta	insectivore	generalist	83	99	16	expansion
Atlantic forests	Micronycteris.megalotis	insectivore	generalist	172	179	7	expansion
Atlantic forests	Micronycteris.minuta	insectivore	generalist	368	395	27	expansion
Atlantic forests	Molossops.temminckii	insectivore	generalist	1194	1409	215	expansion
Atlantic forests	Molossus.rufus	insectivore	generalist	3542	3568	26	expansion
Atlantic forests	Myotis.dinellii	insectivore	generalist	268	664	396	expansion
Atlantic forests	Myotis.nigricans	insectivore	generalist	3542	3586	44	expansion
Atlantic forests	Noctilio.albiventris	insectivore	generalist	2417	3003	586	expansion
Atlantic forests	Noctilio.leporinus	piscivore	generalist	3540	3586	46	expansion
Atlantic forests	Nyctinomops.macrotis	insectivore	generalist	963	1061	98	expansion
Atlantic forests	Peropteryx.macrotis	insectivore	generalist	2143	2483	340	expansion
Atlantic forests	Phylloderma.stenops	omnivore	generalist	545	560	15	expansion
Atlantic forests	Phyllostomus.discolor	omnivore	generalist	1081	1300	219	expansion
Atlantic forests	Phyllostomus.hastatus	omnivore	generalist	1556	2049	493	expansion
Atlantic forests	Platyrrhinus.helleri	frugivore	generalist	79	648	569	expansion
Atlantic forests	Promops.centralis	insectivore	specialist	4	7	3	expansion
Atlantic forests	Pteronotus.personatus	insectivore	generalist	10	42	32	expansion
Atlantic forests	Rhogeessa.io	insectivore	generalist	18	149	131	expansion
Atlantic forests	Saccopteryx.leptura	insectivore	generalist	334	350	16	expansion
Atlantic forests	Tonatia.saurophila	insectivore	generalist	12	79	67	expansion
Atlantic forests	Trachops.cirrhosus	carnivore	generalist	470	477	7	expansion
Atlantic forests	Uroderma.bilobatum	frugivore	generalist	310	743	433	expansion
Atlantic forests	Eumops.maurus	insectivore	generalist	0	11	11	gain
Atlantic forests	Glyphonycteris.behnii	insectivore	generalist	0	43	43	gain
Atlantic forests	Lionycteris.spurrelli	nectarivore	generalist	0	6	6	gain

## Sheet: Caatinga
Bio region	Species	Feeding Habits	Land cover	Present	Future	Projections	Forecasted
Caatinga	Artibeus.concolor	frugivore	specialist	11	0	-11	extinct
Caatinga	Centronycteris.maximiliani	insectivore	specialist	15	0	-15	extinct
Caatinga	Cynomops.planirostris	insectivore	specialist	20	0	-20	extinct
Caatinga	Eptesicus.brasiliensis	insectivore	specialist	22	0	-22	extinct
Caatinga	Eumops.delticus	insectivore	specialist	19	0	-19	extinct
Caatinga	Lasiurus.cinereus	insectivore	generalist	1	0	-1	extinct
Caatinga	Lichonycteris.degener	nectarivore	specialist	3	0	-3	extinct
Caatinga	Macrophyllum.macrophyllum	insectivore	specialist	22	0	-22	extinct
Caatinga	Micronycteris.hirsuta	insectivore	generalist	1	0	-1	extinct
Caatinga	Micronycteris.schmidtorum	insectivore	specialist	5	0	-5	extinct
Caatinga	Myotis.riparius	insectivore	specialist	22	0	-22	extinct
Caatinga	Platyrrhinus.lineatus	frugivore	specialist	15	0	-15	extinct
Caatinga	Rhinophylla.pumilio	frugivore	specialist	10	0	-10	extinct
Caatinga	Sturnira.lilium	frugivore	specialist	21	0	-21	extinct
Caatinga	Sturnira.tildae	frugivore	specialist	21	0	-21	extinct
Caatinga	Tonatia.bidens	omnivore	specialist	4	0	-4	extinct
Caatinga	Uroderma.magnirostrum	frugivore	specialist	12	0	-12	extinct
Caatinga	Anoura.geoffroyi	nectarivore	generalist	310	194	-116	contraction
Caatinga	Artibeus.lituratus	frugivore	generalist	221	148	-73	contraction
Caatinga	Artibeus.obscurus	frugivore	generalist	1852	1509	-343	contraction
Caatinga	Artibeus.planirostris	frugivore	generalist	162	105	-57	contraction
Caatinga	Carollia.brevicauda	frugivore	generalist	994	696	-298	contraction
Caatinga	Carollia.perspicillata	frugivore	generalist	96	11	-85	contraction
Caatinga	Chrotopterus.auritus	carnivore	generalist	289	203	-86	contraction
Caatinga	Cynomops.greenhalli	insectivore	generalist	75	49	-26	contraction
Caatinga	Dermanura.cinerea	frugivore	generalist	2195	1952	-243	contraction
Caatinga	Dermanura.gnoma	frugivore	generalist	212	126	-86	contraction
Caatinga	Desmodus.rotundus	sanguivore	generalist	291	212	-79	contraction
Caatinga	Diaemus.youngi	sanguivore	generalist	301	206	-95	contraction
Caatinga	Diclidurus.albus	insectivore	generalist	232	137	-95	contraction
Caatinga	Eptesicus.diminutus	insectivore	generalist	51	30	-21	contraction
Caatinga	Eptesicus.furinalis	insectivore	generalist	239	156	-83	contraction
Caatinga	Eumops.auripendulus	insectivore	generalist	2418	2330	-88	contraction
Caatinga	Eumops.glaucinus	insectivore	generalist	25	22	-3	contraction
Caatinga	Eumops.perotis	insectivore	generalist	304	213	-91	contraction
Caatinga	Furipterus.horrens	insectivore	generalist	31	2	-29	contraction
Caatinga	Gardnerycteris.crenulatum	insectivore	generalist	1838	1577	-261	contraction
Caatinga	Glossophaga.soricina	nectarivore	generalist	2338	2148	-190	contraction
Caatinga	Histiotus.velatus	insectivore	generalist	50	34	-16	contraction
Caatinga	Lasiurus.blossevillii	insectivore	generalist	2339	2315	-24	contraction
Caatinga	Lasiurus.ega	insectivore	generalist	176	113	-63	contraction
Caatinga	Lonchorhina.aurita	insectivore	generalist	287	156	-131	contraction
Caatinga	Lophostoma.brasiliense	insectivore	generalist	891	617	-274	contraction
Caatinga	Micronycteris.megalotis	insectivore	generalist	233	139	-94	contraction
Caatinga	Micronycteris.minuta	insectivore	generalist	211	126	-85	contraction
Caatinga	Mimon.bennettii	insectivore	generalist	1806	1402	-404	contraction
Caatinga	Molossops.mattogrossensis	insectivore	generalist	57	16	-41	contraction
Caatinga	Molossops.temminckii	insectivore	generalist	183	122	-61	contraction
Caatinga	Molossus.molossus	insectivore	generalist	239	156	-83	contraction
Caatinga	Molossus.rufus	insectivore	generalist	2418	2330	-88	contraction
Caatinga	Myotis.albescens	insectivore	generalist	238	156	-82	contraction
Caatinga	Myotis.nigricans	insectivore	generalist	2491	2450	-41	contraction
Caatinga	Natalus.espiritosantensis	insectivore	specialist	73	40	-33	contraction
Caatinga	Noctilio.albiventris	insectivore	generalist	2382	2273	-109	contraction
Caatinga	Noctilio.leporinus	piscivore	generalist	2492	2450	-42	contraction
Caatinga	Nyctinomops.aurispinosus	insectivore	generalist	279	179	-100	contraction
Caatinga	Nyctinomops.laticaudatus	insectivore	generalist	239	156	-83	contraction
Caatinga	Nyctinomops.macrotis	insectivore	generalist	212	136	-76	contraction
Caatinga	Peropteryx.kappleri	insectivore	generalist	7	1	-6	contraction
Caatinga	Peropteryx.leucoptera	insectivore	generalist	6	1	-5	contraction
Caatinga	Peropteryx.macrotis	insectivore	generalist	2418	2329	-89	contraction
Caatinga	Phylloderma.stenops	omnivore	generalist	1598	921	-677	contraction
Caatinga	Phyllostomus.discolor	omnivore	generalist	2426	2006	-420	contraction
Caatinga	Phyllostomus.elongatus	omnivore	generalist	90	38	-52	contraction
Caatinga	Phyllostomus.hastatus	omnivore	generalist	2319	2133	-186	contraction
Caatinga	Pygoderma.bilabiatum	frugivore	generalist	26	13	-13	contraction
Caatinga	Rhynchonycteris.naso	insectivore	generalist	58	8	-50	contraction
Caatinga	Saccopteryx.bilineata	insectivore	generalist	88	41	-47	contraction
Caatinga	Saccopteryx.leptura	insectivore	generalist	207	122	-85	contraction
Caatinga	Tadarida.brasiliensis	insectivore	generalist	82	53	-29	contraction
Caatinga	Thyroptera.tricolor	insectivore	generalist	1389	1101	-288	contraction
Caatinga	Tonatia.saurophila	insectivore	generalist	16	12	-4	contraction
Caatinga	Trachops.cirrhosus	carnivore	generalist	249	136	-113	contraction
Caatinga	Chiroderma.doriae	frugivore	generalist	78	80	2	expansion
Caatinga	Choeroniscus.minor	nectarivore	generalist	672	770	98	expansion
Caatinga	Diphylla.ecaudata	sanguivore	generalist	1416	1782	366	expansion
Caatinga	Platyrrhinus.recifinus	frugivore	generalist	515	1291	776	expansion
Caatinga	Pteronotus.personatus	insectivore	generalist	1157	1285	128	expansion
Caatinga	Uroderma.bilobatum	frugivore	generalist	796	1199	403	expansion
Caatinga	Eumops.maurus	insectivore	generalist	0	285	285	gain
Caatinga	Glyphonycteris.behnii	insectivore	generalist	0	72	72	gain
Caatinga	Lionycteris.spurrelli	nectarivore	generalist	0	36	36	gain
Caatinga	Lophostoma.carrikeri	insectivore	generalist	0	17	17	gain
Caatinga	Platyrrhinus.helleri	frugivore	generalist	0	184	184	gain
Caatinga	Pteronotus.gymnonotus	insectivore	generalist	0	1	1	gain

## Sheet: West indies
Bio region	Species	Feeding Habits	Land cover	Present	Future	Projections	Forecasted
West indies	Chilonatalus.micropus	insectivore	generalist	1	0	-1	globally extinct
West indies	Anoura.geoffroyi	nectarivore	generalist	1	0	-1	extinct
West indies	Glossophaga.longirostris	nectarivore	generalist	4	0	-4	extinct
West indies	Leptonycteris.curasoae	nectarivore	generalist	1	0	-1	extinct
West indies	Mormoops.megalophylla	insectivore	generalist	1	0	-1	extinct
West indies	Phyllostomus.discolor	omnivore	generalist	3	0	-3	extinct
West indies	Rhogeessa.minutilla	insectivore	generalist	3	0	-3	extinct
West indies	Artibeus.jamaicensis	frugivore	generalist	465	344	-121	contraction
West indies	Artibeus.lituratus	frugivore	generalist	3	2	-1	contraction
West indies	Eptesicus.fuscus	insectivore	generalist	191	122	-69	contraction
West indies	Eumops.auripendulus	insectivore	generalist	35	23	-12	contraction
West indies	Glossophaga.soricina	nectarivore	generalist	38	23	-15	contraction
West indies	Micronycteris.megalotis	insectivore	generalist	3	2	1	contraction
West indies	Molossus.molossus	insectivore	generalist	508	433	-75	contraction
West indies	Natalus.tumidirostris	insectivore	generalist	3	1	-2	contraction
West indies	Noctilio.leporinus	piscivore	generalist	631	552	-79	contraction
West indies	Nyctinomops.laticaudatus	insectivore	generalist	255	244	-11	contraction
West indies	Nyctinomops.macrotis	insectivore	generalist	461	384	-77	contraction
West indies	Peropteryx.macrotis	insectivore	generalist	2	1	-1	contraction
West indies	Saccopteryx.canescens	insectivore	generalist	2	1	-1	contraction
West indies	Tadarida.brasiliensis	insectivore	generalist	441	378	-63	contraction
West indies	Centurio.senex	frugivore	generalist	1	1	0	stable
West indies	Dermanura.glauca	frugivore	generalist	1	1	0	stable
West indies	Micronycteris.minuta	insectivore	generalist	1	1	0	stable
West indies	Rhogeessa.io	insectivore	generalist	1	1	0	stable
West indies	Saccopteryx.leptura	insectivore	generalist	1	1	0	stable
West indies	Vampyrodes.caraccioli	frugivore	generalist	1	1	0	stable

## Sheet: Cerrado and Chaco
Bio region	Species	Feeding Habits	Land cover	Present	Future	Projections	Forecasted
Cerrado and Chaco	Ametrida.centurio	frugivore	specialist	165	0	-165	extinct
Cerrado and Chaco	Artibeus.concolor	frugivore	specialist	14	0	-14	extinct
Cerrado and Chaco	Artibeus.fimbriatus	frugivore	specialist	58	0	-58	extinct
Cerrado and Chaco	Centronycteris.centralis	frugivore	specialist	11	0	-11	extinct
Cerrado and Chaco	Centronycteris.maximiliani	frugivore	specialist	10	0	-10	extinct
Cerrado and Chaco	Cynomops.milleri	insectivore	specialist	136	0	-136	extinct
Cerrado and Chaco	Cynomops.paranus	insectivore	specialist	76	0	-76	extinct
Cerrado and Chaco	Eptesicus.taddeii	insectivore	specialist	6	0	-6	extinct
Cerrado and Chaco	Eumops.delticus	insectivore	specialist	11	0	-11	extinct
Cerrado and Chaco	Lasiurus.egregius	insectivore	specialist	4	0	-4	extinct
Cerrado and Chaco	Lichonycteris.degener	nectarivore	specialist	1	0	-1	extinct
Cerrado and Chaco	Lophostoma.carrikeri	insectivore	generalist	3	0	-3	extinct
Cerrado and Chaco	Lophostoma.silvicolum	insectivore	specialist	14	0	-14	extinct
Cerrado and Chaco	Micronycteris.schmidtorum	insectivore	specialist	13	0	-13	extinct
Cerrado and Chaco	Myotis.levis	insectivore	specialist	63	0	-63	extinct
Cerrado and Chaco	Myotis.ruber	insectivore	generalist	103	0	-103	extinct
Cerrado and Chaco	Myotis.simus	insectivore	generalist	86	0	-86	extinct
Cerrado and Chaco	Peropteryx.kappleri	insectivore	generalist	18	0	-18	extinct
Cerrado and Chaco	Peropteryx.leucoptera	insectivore	generalist	2	0	-2	extinct
Cerrado and Chaco	Pteronotus.rubiginosus	insectivore	specialist	92	0	-92	extinct
Cerrado and Chaco	Thyroptera.discifera	insectivore	generalist	1	0	-1	extinct
Cerrado and Chaco	Anoura.aequatoris	nectarivore	specialist	6	1	-5	contraction
Cerrado and Chaco	Anoura.caudifer	nectarivore	specialist	503	2	-501	contraction
Cerrado and Chaco	Anoura.fistulata	nectarivore	specialist	2	1	-1	contraction
Cerrado and Chaco	Anoura.geoffroyi	nectarivore	generalist	1209	1148	-61	contraction
Cerrado and Chaco	Artibeus.lituratus	frugivore	generalist	1668	1061	-607	contraction
Cerrado and Chaco	Artibeus.obscurus	frugivore	generalist	6504	4982	-1522	contraction
Cerrado and Chaco	Artibeus.planirostris	frugivore	generalist	857	554	-303	contraction
Cerrado and Chaco	Carollia.benkeithi	frugivore	specialist	412	1	-411	contraction
Cerrado and Chaco	Carollia.perspicillata	frugivore	generalist	889	13	-876	contraction
Cerrado and Chaco	Chiroderma.doriae	frugivore	generalist	512	510	-2	contraction
Cerrado and Chaco	Chiroderma.salvini	frugivore	generalist	171	59	-112	contraction
Cerrado and Chaco	Chiroderma.trinitatum	frugivore	generalist	405	5	-400	contraction
Cerrado and Chaco	Chiroderma.villosum	frugivore	specialist	592	1	-591	contraction
Cerrado and Chaco	Chrotopterus.auritus	carnivore	generalist	1751	1171	-580	contraction
Cerrado and Chaco	Cormura.brevirostris	insectivore	specialist	313	1	-312	contraction
Cerrado and Chaco	Cynomops.abrasus	insectivore	specialist	751	1	-750	contraction
Cerrado and Chaco	Cynomops.planirostris	insectivore	specialist	800	4	-796	contraction
Cerrado and Chaco	Dermanura.anderseni	frugivore	generalist	312	142	-170	contraction
Cerrado and Chaco	Dermanura.gnoma	frugivore	generalist	875	614	-261	contraction
Cerrado and Chaco	Desmodus.rotundus	sanguivore	generalist	1388	1155	-233	contraction
Cerrado and Chaco	Diaemus.youngi	sanguivore	generalist	1733	998	-735	contraction
Cerrado and Chaco	Diclidurus.albus	insectivore	generalist	1519	832	-687	contraction
Cerrado and Chaco	Enchisthenes.hartii	frugivore	specialist	25	1	-24	contraction
Cerrado and Chaco	Eptesicus.brasiliensis	insectivore	specialist	821	4	-817	contraction
Cerrado and Chaco	Eptesicus.furinalis	insectivore	generalist	3191	1950	-1241	contraction
Cerrado and Chaco	Eumops.bonariensis	insectivore	generalist	735	586	-149	contraction
Cerrado and Chaco	Eumops.glaucinus	insectivore	generalist	1782	1600	-182	contraction
Cerrado and Chaco	Eumops.patagonicus	insectivore	generalist	1587	1026	-561	contraction
Cerrado and Chaco	Eumops.perotis	insectivore	generalist	3504	2347	-1157	contraction
Cerrado and Chaco	Furipterus.horrens	insectivore	generalist	46	5	-41	contraction
Cerrado and Chaco	Histiotus.laephotis	insectivore	specialist	577	58	-519	contraction
Cerrado and Chaco	Lasiurus.cinereus	insectivore	generalist	3528	2506	-1022	contraction
Cerrado and Chaco	Lasiurus.ega	insectivore	generalist	2848	1839	-1009	contraction
Cerrado and Chaco	Lonchophylla.thomasi	nectarivore	generalist	323	156	-167	contraction
Cerrado and Chaco	Lonchorhina.aurita	insectivore	generalist	953	839	-114	contraction
Cerrado and Chaco	Macrophyllum.macrophyllum	insectivore	specialist	795	2	-793	contraction
Cerrado and Chaco	Mesophylla.macconnelli	insectivore	specialist	351	1	-350	contraction
Cerrado and Chaco	Micronycteris.hirsuta	insectivore	generalist	18	9	-9	contraction
Cerrado and Chaco	Micronycteris.megalotis	insectivore	generalist	1213	747	-466	contraction
Cerrado and Chaco	Micronycteris.minuta	insectivore	generalist	1260	860	-400	contraction
Cerrado and Chaco	Mimon.bennettii	insectivore	generalist	3427	3395	-32	contraction
Cerrado and Chaco	Molossops.mattogrossensis	insectivore	generalist	143	5	-138	contraction
Cerrado and Chaco	Molossops.temminckii	insectivore	generalist	3313	1989	-1324	contraction
Cerrado and Chaco	Molossus.coibensis	insectivore	generalist	175	126	-49	contraction
Cerrado and Chaco	Molossus.molossus	insectivore	generalist	3093	1860	-1233	contraction
Cerrado and Chaco	Myotis.albescens	insectivore	generalist	2601	1536	-1065	contraction
Cerrado and Chaco	Myotis.keaysi	insectivore	specialist	22	1	-21	contraction
Cerrado and Chaco	Myotis.riparius	insectivore	specialist	1803	63	-1740	contraction
Cerrado and Chaco	Nyctinomops.laticaudatus	insectivore	generalist	2096	1314	-782	contraction
Cerrado and Chaco	Nyctinomops.macrotis	insectivore	generalist	2111	1848	-263	contraction
Cerrado and Chaco	Phyllostomus.elongatus	omnivore	generalist	600	18	-582	contraction
Cerrado and Chaco	Platyrrhinus.albericoi	frugivore	specialist	34	1	-33	contraction
Cerrado and Chaco	Platyrrhinus.brachycephalus	frugivore	generalist	160	1	-159	contraction
Cerrado and Chaco	Platyrrhinus.incarum	frugivore	specialist	449	1	-448	contraction
Cerrado and Chaco	Platyrrhinus.lineatus	frugivore	specialist	855	79	-776	contraction
Cerrado and Chaco	Platyrrhinus.masu	frugivore	specialist	5	1	-4	contraction
Cerrado and Chaco	Platyrrhinus.nigellus	frugivore	specialist	9	1	-8	contraction
Cerrado and Chaco	Promops.centralis	insectivore	specialist	480	4	-476	contraction
Cerrado and Chaco	Rhinophylla.pumilio	frugivore	specialist	107	1	-106	contraction
Cerrado and Chaco	Rhogeessa.io	insectivore	generalist	771	508	-263	contraction
Cerrado and Chaco	Rhynchonycteris.naso	insectivore	generalist	479	8	-471	contraction
Cerrado and Chaco	Saccopteryx.bilineata	insectivore	generalist	699	42	-657	contraction
Cerrado and Chaco	Saccopteryx.leptura	insectivore	generalist	1145	822	-323	contraction
Cerrado and Chaco	Sturnira.erythromos	frugivore	specialist	33	2	-31	contraction
Cerrado and Chaco	Sturnira.lilium	frugivore	specialist	1073	79	-994	contraction
Cerrado and Chaco	Sturnira.magna	frugivore	specialist	9	1	-8	contraction
Cerrado and Chaco	Sturnira.oporaphilum	frugivore	specialist	26	2	-24	contraction
Cerrado and Chaco	Sturnira.tildae	frugivore	specialist	585	1	-584	contraction
Cerrado and Chaco	Tadarida.brasiliensis	insectivore	generalist	2695	2390	-305	contraction
Cerrado and Chaco	Tonatia.bidens	omnivore	specialist	662	78	-584	contraction
Cerrado and Chaco	Trachops.cirrhosus	carnivore	generalist	1419	824	-595	contraction
Cerrado and Chaco	Uroderma.magnirostrum	frugivore	specialist	467	1	-466	contraction
Cerrado and Chaco	Vampyressa.thyone	frugivore	specialist	19	1	-18	contraction
Cerrado and Chaco	Vampyriscus.bidens	frugivore	specialist	40	1	-39	contraction
Cerrado and Chaco	Vampyrodes.caraccioli	frugivore	generalist	220	146	-74	contraction
Cerrado and Chaco	Vampyrum.spectrum	carnivore	specialist	374	1	-373	contraction
Cerrado and Chaco	Anoura.cultrata	nectarivore	generalist	8	116	108	expansion
Cerrado and Chaco	Anoura.peruana	nectarivore	generalist	91	165	74	expansion
Cerrado and Chaco	Carollia.brevicauda	frugivore	generalist	2406	3105	699	expansion
Cerrado and Chaco	Choeroniscus.minor	nectarivore	generalist	84	109	25	expansion
Cerrado and Chaco	Cynomops.greenhalli	insectivore	generalist	5	6	1	expansion
Cerrado and Chaco	Dermanura.cinerea	frugivore	generalist	2286	3100	814	expansion
Cerrado and Chaco	Dermanura.glauca	frugivore	generalist	62	96	34	expansion
Cerrado and Chaco	Diphylla.ecaudata	sanguivore	generalist	5217	5450	233	expansion
Cerrado and Chaco	Eptesicus.diminutus	insectivore	generalist	740	1333	593	expansion
Cerrado and Chaco	Eumops.auripendulus	insectivore	generalist	8628	8996	368	expansion
Cerrado and Chaco	Eumops.dabbenei	insectivore	generalist	3425	7611	4186	expansion
Cerrado and Chaco	Eumops.hansae	insectivore	generalist	388	788	400	expansion
Cerrado and Chaco	Gardnerycteris.crenulatum	insectivore	generalist	3974	5788	1814	expansion
Cerrado and Chaco	Glossophaga.soricina	nectarivore	generalist	7629	8104	475	expansion
Cerrado and Chaco	Glyphonycteris.behnii	insectivore	generalist	1405	2421	1016	expansion
Cerrado and Chaco	Histiotus.macrotus	insectivore	generalist	272	386	114	expansion
Cerrado and Chaco	Histiotus.montanus	insectivore	generalist	147	282	135	expansion
Cerrado and Chaco	Histiotus.velatus	insectivore	generalist	903	927	24	expansion
Cerrado and Chaco	Lasiurus.blossevillii	insectivore	generalist	9532	10735	1203	expansion
Cerrado and Chaco	Lasiurus.salinae	insectivore	specialist	242	548	306	expansion
Cerrado and Chaco	Lionycteris.spurrelli	nectarivore	generalist	97	1044	947	expansion
Cerrado and Chaco	Lophostoma.brasiliense	insectivore	generalist	355	1803	1448	expansion
Cerrado and Chaco	Molossus.rufus	insectivore	generalist	9589	10374	785	expansion
Cerrado and Chaco	Myotis.dinellii	insectivore	generalist	697	989	292	expansion
Cerrado and Chaco	Myotis.nigricans	insectivore	generalist	9395	10054	659	expansion
Cerrado and Chaco	Myotis.oxyotus	insectivore	generalist	6	7	1	expansion
Cerrado and Chaco	Noctilio.albiventris	insectivore	generalist	7778	7994	216	expansion
Cerrado and Chaco	Noctilio.leporinus	piscivore	generalist	9574	9964	390	expansion
Cerrado and Chaco	Nyctinomops.aurispinosus	insectivore	generalist	305	347	42	expansion
Cerrado and Chaco	Peropteryx.macrotis	insectivore	generalist	7419	7804	385	expansion
Cerrado and Chaco	Phylloderma.stenops	omnivore	generalist	2844	3862	1018	expansion
Cerrado and Chaco	Phyllostomus.discolor	omnivore	generalist	6146	6933	787	expansion
Cerrado and Chaco	Phyllostomus.hastatus	omnivore	generalist	6978	7570	592	expansion
Cerrado and Chaco	Platyrrhinus.helleri	frugivore	generalist	2314	4824	2510	expansion
Cerrado and Chaco	Platyrrhinus.infuscus	frugivore	generalist	38	93	55	expansion
Cerrado and Chaco	Platyrrhinus.recifinus	frugivore	generalist	285	965	680	expansion
Cerrado and Chaco	Pteronotus.gymnonotus	insectivore	generalist	759	2050	1291	expansion
Cerrado and Chaco	Pteronotus.personatus	insectivore	generalist	1963	4105	2142	expansion
Cerrado and Chaco	Pygoderma.bilabiatum	frugivore	generalist	832	1075	243	expansion
Cerrado and Chaco	Thyroptera.tricolor	insectivore	generalist	1668	3695	2027	expansion
Cerrado and Chaco	Tonatia.saurophila	insectivore	generalist	19	90	71	expansion
Cerrado and Chaco	Trinycteris.nicefori	insectivore	generalist	2	7	5	expansion
Cerrado and Chaco	Uroderma.bilobatum	frugivore	generalist	6094	6868	774	expansion
Cerrado and Chaco	Anoura.latidens	nectarivore	generalist	0	105	105	gain
Cerrado and Chaco	Dermanura.phaeotis	frugivore	generalist	0	90	90	gain
Cerrado and Chaco	Eumops.maurus	insectivore	generalist	0	248	248	gain
Cerrado and Chaco	Eumops.trumbulli	insectivore	generalist	0	3	3	gain
Cerrado and Chaco	Glossophaga.commissarisi	nectarivore	specialist	0	1	1	gain
Cerrado and Chaco	Glossophaga.longirostris	nectarivore	generalist	0	102	102	gain
Cerrado and Chaco	Lampronycteris.brachyotis	omnivore	generalist	0	1	1	gain
Cerrado and Chaco	Micronycteris.microtis	insectivore	generalist	0	67	67	gain
Cerrado and Chaco	Molossus.pretiosus	insectivore	generalist	0	68	68	gain
Cerrado and Chaco	Mormopterus.kalinowskii	insectivore	generalist	0	8	8	gain
Cerrado and Chaco	Platalina.genovensium	nectarivore	generalist	0	7	7	gain
Cerrado and Chaco	Platyrrhinus.ismaeli	frugivore	generalist	0	7	7	gain
Cerrado and Chaco	Pteronotus.davyi	insectivore	generalist	0	1	1	gain
Cerrado and Chaco	Saccopteryx.canescens	insectivore	generalist	0	41	41	gain

## Sheet: Dry North South America
Bio region	Species	Feeding Habits	Land cover	Present	Future	Projections	Forecasted
Dry Northern	Phyllostomus.latifolius	omnivore	specialist	2	0	-2	globally extinct
Dry Northern	Anoura.luismanueli	nectarivore	generalist	1	0	-1	extinct
Dry Northern	Cynomops.milleri	insectivore	specialist	29	0	-29	extinct
Dry Northern	Dermanura.rava	frugivore	specialist	1	0	-1	extinct
Dry Northern	Dermanura.watsoni	frugivore	generalist	2	0	-2	extinct
Dry Northern	Glyphonycteris.daviesi	insectivore	specialist	84	0	-84	extinct
Dry Northern	Histiotus.humboldti	insectivore	specialist	2	0	-2	extinct
Dry Northern	Lonchophylla.orienticollina	nectarivore	specialist	1	0	-1	extinct
Dry Northern	Lonchorhina.fernandezi	insectivore	generalist	1	0	-1	extinct
Dry Northern	Mimon.cozumelae	insectivore	generalist	3	0	-3	extinct
Dry Northern	Peropteryx.pallidoptera	insectivore	specialist	14	0	-14	extinct
Dry Northern	Platyrrhinus.nigellus	frugivore	generalist	12	0	-12	extinct
Dry Northern	Sturnira.bidens	frugivore	specialist	3	0	-3	extinct
Dry Northern	Sturnira.bogotensis	frugivore	specialist	3	0	-3	extinct
Dry Northern	Vampyressa.melissa	frugivore	specialist	8	0	-8	extinct
Dry Northern	Ametrida.centurio	frugivore	specialist	205	9	-196	contraction
Dry Northern	Anoura.caudifer	nectarivore	specialist	141	7	-134	contraction
Dry Northern	Anoura.geoffroyi	nectarivore	generalist	755	666	-89	contraction
Dry Northern	Artibeus.amplus	frugivore	specialist	29	8	-21	contraction
Dry Northern	Artibeus.concolor	frugivore	specialist	138	9	-129	contraction
Dry Northern	Artibeus.lituratus	frugivore	generalist	772	682	-90	contraction
Dry Northern	Artibeus.obscurus	frugivore	generalist	698	511	-187	contraction
Dry Northern	Carollia.brevicauda	frugivore	generalist	2286	2177	-109	contraction
Dry Northern	Carollia.castanea	frugivore	generalist	566	436	-130	contraction
Dry Northern	Carollia.perspicillata	frugivore	generalist	277	23	-254	contraction
Dry Northern	Centronycteris.centralis	insectivore	specialist	64	3	-61	contraction
Dry Northern	Centronycteris.maximiliani	insectivore	specialist	88	9	-79	contraction
Dry Northern	Chiroderma.salvini	frugivore	generalist	1102	332	-770	contraction
Dry Northern	Chiroderma.trinitatum	frugivore	generalist	189	12	-177	contraction
Dry Northern	Chiroderma.villosum	frugivore	specialist	240	9	-231	contraction
Dry Northern	Choeroniscus.godmani	nectarivore	generalist	620	445	-175	contraction
Dry Northern	Chrotopterus.auritus	carnivore	generalist	740	706	-34	contraction
Dry Northern	Cormura.brevirostris	insectivore	specialist	197	7	-190	contraction
Dry Northern	Cynomops.abrasus	insectivore	specialist	124	4	-120	contraction
Dry Northern	Cynomops.greenhalli	insectivore	generalist	651	530	-121	contraction
Dry Northern	Cynomops.paranus	insectivore	specialist	205	9	-196	contraction
Dry Northern	Cynomops.planirostris	insectivore	specialist	232	9	-223	contraction
Dry Northern	Dermanura.bogotensis	frugivore	specialist	5	4	-1	contraction
Dry Northern	Dermanura.phaeotis	frugivore	generalist	708	543	-165	contraction
Dry Northern	Desmodus.rotundus	sanguivore	generalist	548	482	-66	contraction
Dry Northern	Diaemus.youngi	sanguivore	generalist	796	705	-91	contraction
Dry Northern	Diclidurus.albus	insectivore	generalist	772	682	-90	contraction
Dry Northern	Diphylla.ecaudata	sanguivore	generalist	1456	579	-877	contraction
Dry Northern	Enchisthenes.hartii	frugivore	specialist	136	9	-127	contraction
Dry Northern	Eptesicus.brasiliensis	insectivore	specialist	250	9	-241	contraction
Dry Northern	Eptesicus.chiriquinus	insectivore	specialist	21	7	-14	contraction
Dry Northern	Eptesicus.furinalis	insectivore	generalist	770	681	-89	contraction
Dry Northern	Eumops.auripendulus	insectivore	generalist	2293	2225	-68	contraction
Dry Northern	Eumops.dabbenei	insectivore	generalist	1316	868	-448	contraction
Dry Northern	Eumops.hansae	insectivore	generalist	1652	466	-1186	contraction
Dry Northern	Eumops.trumbulli	insectivore	generalist	130	100	-30	contraction
Dry Northern	Furipterus.horrens	insectivore	generalist	276	23	-253	contraction
Dry Northern	Gardnerycteris.crenulatum	insectivore	generalist	2295	2221	-74	contraction
Dry Northern	Glossophaga.commissarisi	nectarivore	specialist	75	7	-68	contraction
Dry Northern	Glossophaga.longirostris	nectarivore	generalist	1388	261	-1127	contraction
Dry Northern	Glossophaga.soricina	nectarivore	generalist	2325	2258	-67	contraction
Dry Northern	Glyphonycteris.sylvestris	insectivore	generalist	182	12	-170	contraction
Dry Northern	Lampronycteris.brachyotis	insectivore	generalist	287	177	-110	contraction
Dry Northern	Lasiurus.blossevillii	insectivore	generalist	2275	2208	-67	contraction
Dry Northern	Lasiurus.ega	insectivore	generalist	691	676	-15	contraction
Dry Northern	Lasiurus.egregius	insectivore	specialist	34	7	-27	contraction
Dry Northern	Leptonycteris.curasoae	nectarivore	generalist	131	12	-119	contraction
Dry Northern	Lichonycteris.degener	nectarivore	specialist	176	9	-167	contraction
Dry Northern	Lionycteris.spurrelli	nectarivore	generalist	2152	1945	-207	contraction
Dry Northern	Lonchophylla.robusta	nectarivore	generalist	32	23	-9	contraction
Dry Northern	Lonchophylla.thomasi	nectarivore	generalist	613	482	-131	contraction
Dry Northern	Lonchorhina.aurita	insectivore	generalist	799	706	-93	contraction
Dry Northern	Lonchorhina.inusitata	insectivore	generalist	79	9	-70	contraction
Dry Northern	Lonchorhina.orinocensis	insectivore	generalist	409	78	-331	contraction
Dry Northern	Lophostoma.carrikeri	insectivore	generalist	574	324	-250	contraction
Dry Northern	Lophostoma.silvicolum	insectivore	specialist	172	8	-164	contraction
Dry Northern	Macrophyllum.macrophyllum	insectivore	specialist	250	9	-241	contraction
Dry Northern	Mesophylla.macconnelli	insectivore	specialist	235	1	-234	contraction
Dry Northern	Micronycteris.brosseti	insectivore	specialist	9	1	-8	contraction
Dry Northern	Micronycteris.hirsuta	insectivore	generalist	701	625	-76	contraction
Dry Northern	Micronycteris.megalotis	insectivore	generalist	786	694	-92	contraction
Dry Northern	Micronycteris.minuta	insectivore	generalist	718	688	-30	contraction
Dry Northern	Micronycteris.schmidtorum	insectivore	specialist	172	9	-163	contraction
Dry Northern	Mimon.bennettii	insectivore	generalist	1370	535	-835	contraction
Dry Northern	Molossops.mattogrossensis	insectivore	generalist	110	10	-100	contraction
Dry Northern	Molossus.coibensis	insectivore	generalist	653	572	-81	contraction
Dry Northern	Molossus.molossus	insectivore	generalist	771	682	-89	contraction
Dry Northern	Molossus.pretiosus	insectivore	generalist	633	600	-33	contraction
Dry Northern	Molossus.rufus	insectivore	generalist	2294	2225	-69	contraction
Dry Northern	Mormoops.megalophylla	insectivore	generalist	129	17	-112	contraction
Dry Northern	Myotis.albescens	insectivore	generalist	771	682	-89	contraction
Dry Northern	Myotis.keaysi	insectivore	specialist	106	9	-97	contraction
Dry Northern	Myotis.nigricans	insectivore	generalist	2320	2256	-64	contraction
Dry Northern	Myotis.riparius	insectivore	specialist	250	9	-241	contraction
Dry Northern	Noctilio.albiventris	insectivore	generalist	2268	2221	-47	contraction
Dry Northern	Noctilio.leporinus	piscivore	generalist	2322	2258	-64	contraction
Dry Northern	Nyctinomops.laticaudatus	insectivore	generalist	730	682	-48	contraction
Dry Northern	Nyctinomops.macrotis	insectivore	generalist	763	656	-107	contraction
Dry Northern	Peropteryx.kappleri	insectivore	generalist	274	23	-251	contraction
Dry Northern	Peropteryx.leucoptera	insectivore	generalist	92	10	-82	contraction
Dry Northern	Peropteryx.macrotis	insectivore	generalist	2295	2223	-72	contraction
Dry Northern	Phylloderma.stenops	omnivore	generalist	1773	515	-1258	contraction
Dry Northern	Phyllostomus.discolor	omnivore	generalist	2320	2252	-68	contraction
Dry Northern	Phyllostomus.elongatus	omnivore	generalist	227	12	-215	contraction
Dry Northern	Phyllostomus.hastatus	omnivore	generalist	2267	2224	-43	contraction
Dry Northern	Platyrrhinus.angustirostris	frugivore	generalist	118	7	-111	contraction
Dry Northern	Platyrrhinus.aurarius	frugivore	specialist	21	1	-20	contraction
Dry Northern	Platyrrhinus.brachycephalus	frugivore	generalist	143	10	-133	contraction
Dry Northern	Platyrrhinus.dorsalis	frugivore	specialist	62	7	-55	contraction
Dry Northern	Platyrrhinus.fusciventris	frugivore	specialist	74	7	-67	contraction
Dry Northern	Platyrrhinus.helleri	frugivore	generalist	1956	1861	-95	contraction
Dry Northern	Platyrrhinus.infuscus	frugivore	generalist	8	1	-7	contraction
Dry Northern	Platyrrhinus.vittatus	frugivore	specialist	84	9	-75	contraction
Dry Northern	Promops.centralis	insectivore	specialist	169	9	-160	contraction
Dry Northern	Pteronotus.davyi	insectivore	generalist	192	22	-170	contraction
Dry Northern	Pteronotus.gymnonotus	insectivore	generalist	1212	480	-732	contraction
Dry Northern	Pteronotus.personatus	insectivore	generalist	713	267	-446	contraction
Dry Northern	Pteronotus.rubiginosus	insectivore	specialist	117	9	-108	contraction
Dry Northern	Rhinophylla.fischerae	insectivore	specialist	43	7	-36	contraction
Dry Northern	Rhinophylla.pumilio	insectivore	specialist	152	9	-143	contraction
Dry Northern	Rhogeessa.io	insectivore	generalist	570	562	-8	contraction
Dry Northern	Rhogeessa.minutilla	insectivore	generalist	701	227	-474	contraction
Dry Northern	Rhynchonycteris.naso	insectivore	generalist	277	23	-254	contraction
Dry Northern	Saccopteryx.bilineata	insectivore	generalist	277	23	-254	contraction
Dry Northern	Saccopteryx.canescens	insectivore	generalist	647	591	-56	contraction
Dry Northern	Saccopteryx.leptura	insectivore	generalist	772	682	-90	contraction
Dry Northern	Sphaeronycteris.toxophyllum	insectivore	specialist	167	1	-166	contraction
Dry Northern	Sturnira.erythromos	frugivore	specialist	83	7	-76	contraction
Dry Northern	Sturnira.ludovici	frugivore	specialist	116	9	-107	contraction
Dry Northern	Sturnira.tildae	frugivore	specialist	193	9	-184	contraction
Dry Northern	Thyroptera.discifera	insectivore	generalist	607	379	-228	contraction
Dry Northern	Thyroptera.tricolor	insectivore	generalist	1541	514	-1027	contraction
Dry Northern	Tonatia.saurophila	insectivore	generalist	698	673	-25	contraction
Dry Northern	Trachops.cirrhosus	carnivore	generalist	793	701	-92	contraction
Dry Northern	Uroderma.magnirostrum	frugivore	specialist	245	9	-236	contraction
Dry Northern	Vampyressa.thyone	frugivore	specialist	178	9	-169	contraction
Dry Northern	Vampyriscus.bidens	frugivore	specialist	149	7	-142	contraction
Dry Northern	Vampyriscus.brocki	frugivore	specialist	19	6	-13	contraction
Dry Northern	Vampyrum.spectrum	carnivore	specialist	203	8	-195	contraction
Dry Northern	Dermanura.tolteca	frugivore	generalist	1	1	0	stable
Dry Northern	Eumops.delticus	insectivore	specialist	9	9	0	stable
Dry Northern	Anoura.cultrata	nectarivore	generalist	53	57	4	expansion
Dry Northern	Anoura.latidens	nectarivore	generalist	73	131	58	expansion
Dry Northern	Anoura.peruana	nectarivore	generalist	9	33	24	expansion
Dry Northern	Artibeus.jamaicensis	frugivore	generalist	78	218	140	expansion
Dry Northern	Artibeus.planirostris	frugivore	generalist	174	357	183	expansion
Dry Northern	Centurio.senex	frugivore	generalist	466	517	51	expansion
Dry Northern	Choeroniscus.minor	nectarivore	generalist	1285	2196	911	expansion
Dry Northern	Cyttarops.alecto	insectivore	generalist	13	51	38	expansion
Dry Northern	Dermanura.cinerea	frugivore	generalist	426	1499	1073	expansion
Dry Northern	Dermanura.glauca	frugivore	generalist	574	663	89	expansion
Dry Northern	Dermanura.gnoma	frugivore	generalist	549	613	64	expansion
Dry Northern	Diclidurus.isabella	insectivore	generalist	66	77	11	expansion
Dry Northern	Diclidurus.scutatus	insectivore	generalist	44	76	32	expansion
Dry Northern	Eptesicus.diminutus	insectivore	generalist	45	96	51	expansion
Dry Northern	Eptesicus.fuscus	insectivore	generalist	19	33	14	expansion
Dry Northern	Eumops.glaucinus	insectivore	generalist	269	315	46	expansion
Dry Northern	Eumops.maurus	insectivore	generalist	402	1798	1396	expansion
Dry Northern	Eumops.nanus	insectivore	generalist	1	4	3	expansion
Dry Northern	Eumops.perotis	insectivore	generalist	5	240	235	expansion
Dry Northern	Histiotus.montanus	insectivore	generalist	49	84	35	expansion
Dry Northern	Lichonycteris.obscura	nectarivore	generalist	3	19	16	expansion
Dry Northern	Lonchophylla.concava	nectarivore	generalist	2	18	16	expansion
Dry Northern	Lophostoma.brasiliense	insectivore	generalist	1964	2224	260	expansion
Dry Northern	Micronycteris.microtis	insectivore	generalist	159	205	46	expansion
Dry Northern	Molossops.temminckii	insectivore	generalist	233	577	344	expansion
Dry Northern	Molossus.aztecus	insectivore	generalist	5	164	159	expansion
Dry Northern	Molossus.bondae	insectivore	generalist	59	128	69	expansion
Dry Northern	Molossus.sinaloae	insectivore	generalist	326	415	89	expansion
Dry Northern	Myotis.oxyotus	insectivore	generalist	453	485	32	expansion
Dry Northern	Natalus.tumidirostris	insectivore	generalist	525	533	8	expansion
Dry Northern	Nyctinomops.aurispinosus	insectivore	generalist	291	418	127	expansion
Dry Northern	Tadarida.brasiliensis	insectivore	generalist	319	451	132	expansion
Dry Northern	Trinycteris.nicefori	insectivore	generalist	584	592	8	expansion
Dry Northern	Uroderma.bilobatum	frugivore	generalist	1761	2077	316	expansion
Dry Northern	Vampyrodes.caraccioli	frugivore	generalist	432	546	114	expansion
Dry Northern	Vampyrodes.major	frugivore	generalist	9	42	33	expansion
Dry Northern	Dermanura.anderseni	frugivore	generalist	0	335	335	gain
Dry Northern	Diclidurus.ingens	insectivore	generalist	0	8	8	gain
Dry Northern	Scleronycteris.ega	nectarivore	generalist	0	47	47	gain

## Sheet: Dry South America West
Bio region	Species	Feeding Habits	Land cover	Present	Future	Projections	Forecasted
Dry Western	Eptesicus.innoxius	insectivore	specialist	14	0	-14	globally extinct
Dry Western	Dermanura.rava	frugivore	specialist	11	0	-11	extinct
Dry Western	Dermanura.rosenbergi	frugivore	specialist	3	0	-3	extinct
Dry Western	Platyrrhinus.angustirostris	frugivore	generalist	3	0	-3	extinct
Dry Western	Platyrrhinus.lineatus	frugivore	specialist	3	0	-3	extinct
Dry Western	Rhinophylla.alethina	insectivore	specialist	2	0	-2	extinct
Dry Western	Sturnira.bogotensis	frugivore	specialist	5	0	-5	extinct
Dry Western	Sturnira.luisi	frugivore	specialist	15	0	-15	extinct
Dry Western	Artibeus.aequatorialis	frugivore	specialist	13	5	-8	contraction
Dry Western	Artibeus.fraterculus	frugivore	generalist	93	40	-53	contraction
Dry Western	Artibeus.lituratus	frugivore	generalist	77	67	-10	contraction
Dry Western	Carollia.perspicillata	frugivore	generalist	21	5	-16	contraction
Dry Western	Centronycteris.centralis	frugivore	specialist	12	5	-7	contraction
Dry Western	Chiroderma.salvini	frugivore	generalist	92	78	-14	contraction
Dry Western	Chiroderma.villosum	frugivore	specialist	14	5	-9	contraction
Dry Western	Dermanura.phaeotis	frugivore	generalist	47	46	-1	contraction
Dry Western	Desmodus.rotundus	sanguivore	generalist	877	829	-48	contraction
Dry Western	Enchisthenes.hartii	frugivore	specialist	18	3	-15	contraction
Dry Western	Eptesicus.brasiliensis	insectivore	specialist	23	5	-18	contraction
Dry Western	Eptesicus.furinalis	insectivore	generalist	81	65	-16	contraction
Dry Western	Glossophaga.commissarisi	nectarivore	specialist	7	5	-2	contraction
Dry Western	Lonchophylla.handleyi	nectarivore	generalist	6	2	-4	contraction
Dry Western	Macrophyllum.macrophyllum	insectivore	specialist	9	5	-4	contraction
Dry Western	Mesophylla.macconnelli	insectivore	specialist	13	5	-8	contraction
Dry Western	Molossus.bondae	insectivore	generalist	35	20	-15	contraction
Dry Western	Molossus.molossus	insectivore	generalist	103	67	-36	contraction
Dry Western	Mormoops.megalophylla	insectivore	generalist	76	61	-15	contraction
Dry Western	Myotis.albescens	insectivore	generalist	84	66	-18	contraction
Dry Western	Myotis.keaysi	insectivore	specialist	25	3	-22	contraction
Dry Western	Myotis.oxyotus	insectivore	generalist	111	65	-46	contraction
Dry Western	Myotis.riparius	insectivore	specialist	23	5	-18	contraction
Dry Western	Nyctinomops.laticaudatus	insectivore	generalist	89	67	-22	contraction
Dry Western	Peropteryx.kappleri	insectivore	generalist	13	5	-8	contraction
Dry Western	Platyrrhinus.ismaeli	frugivore	generalist	9	4	-5	contraction
Dry Western	Platyrrhinus.nigellus	frugivore	specialist	7	5	-2	contraction
Dry Western	Promops.centralis	insectivore	specialist	25	5	-20	contraction
Dry Western	Rhinophylla.pumilio	insectivore	specialist	9	5	-4	contraction
Dry Western	Rhynchonycteris.naso	insectivore	generalist	8	5	-3	contraction
Dry Western	Saccopteryx.bilineata	insectivore	generalist	26	13	-13	contraction
Dry Western	Sturnira.bidens	frugivore	specialist	10	3	-7	contraction
Dry Western	Sturnira.erythromos	frugivore	specialist	9	2	-7	contraction
Dry Western	Sturnira.magna	frugivore	specialist	9	5	-4	contraction
Dry Western	Sturnira.tildae	frugivore	specialist	9	5	-4	contraction
Dry Western	Tadarida.brasiliensis	insectivore	generalist	752	714	-38	contraction
Dry Western	Vampyriscus.bidens	frugivore	specialist	10	5	-5	contraction
Dry Western	Vampyressa.thyone	frugivore	specialist	15	5	-10	contraction
Dry Western	Vampyrum.spectrum	carnivore	specialist	19	5	-14	contraction
Dry Western	Anoura.aequatoris	nectarivore	specialist	5	5	0	stable
Dry Western	Lichonycteris.obscura	nectarivore	generalist	48	48	0	stable
Dry Western	Anoura.cultrata	nectarivore	generalist	13	736	723	expansion
Dry Western	Anoura.geoffroyi	nectarivore	generalist	417	681	264	expansion
Dry Western	Anoura.latidens	nectarivore	generalist	60	505	445	expansion
Dry Western	Anoura.peruana	nectarivore	generalist	123	482	359	expansion
Dry Western	Carollia.brevicauda	frugivore	generalist	96	162	66	expansion
Dry Western	Carollia.castanea	frugivore	generalist	40	46	6	expansion
Dry Western	Choeroniscus.minor	nectarivore	generalist	77	116	39	expansion
Dry Western	Chrotopterus.auritus	carnivore	generalist	6	62	56	expansion
Dry Western	Cynomops.greenhalli	insectivore	generalist	2	11	9	expansion
Dry Western	Diclidurus.albus	insectivore	generalist	46	61	15	expansion
Dry Western	Diphylla.ecaudata	sanguivore	generalist	67	318	251	expansion
Dry Western	Eumops.auripendulus	insectivore	generalist	150	181	31	expansion
Dry Western	Eumops.hansae	insectivore	generalist	4	27	23	expansion
Dry Western	Gardnerycteris.crenulatum	insectivore	generalist	100	179	79	expansion
Dry Western	Glossophaga.soricina	nectarivore	generalist	360	544	184	expansion
Dry Western	Histiotus.montanus	insectivore	generalist	372	688	316	expansion
Dry Western	Lasiurus.blossevillii	insectivore	generalist	63	111	48	expansion
Dry Western	Lasiurus.ega	insectivore	generalist	46	61	15	expansion
Dry Western	Lionycteris.spurrelli	nectarivore	generalist	17	231	214	expansion
Dry Western	Lonchophylla.concava	nectarivore	generalist	45	46	1	expansion
Dry Western	Lonchophylla.robusta	nectarivore	generalist	36	45	9	expansion
Dry Western	Lonchophylla.thomasi	nectarivore	generalist	16	41	25	expansion
Dry Western	Lonchorhina.aurita	insectivore	generalist	57	74	17	expansion
Dry Western	Lophostoma.brasiliense	insectivore	generalist	2	131	129	expansion
Dry Western	Micronycteris.hirsuta	insectivore	generalist	34	58	24	expansion
Dry Western	Micronycteris.megalotis	insectivore	generalist	83	95	12	expansion
Dry Western	Micronycteris.minuta	insectivore	generalist	14	61	47	expansion
Dry Western	Molossus.rufus	insectivore	generalist	171	179	8	expansion
Dry Western	Mormopterus.kalinowskii	insectivore	generalist	758	767	9	expansion
Dry Western	Myotis.nigricans	insectivore	generalist	251	503	252	expansion
Dry Western	Noctilio.leporinus	piscivore	generalist	235	599	364	expansion
Dry Western	Nyctinomops.aurispinosus	insectivore	generalist	280	778	498	expansion
Dry Western	Nyctinomops.macrotis	insectivore	generalist	56	60	4	expansion
Dry Western	Peropteryx.macrotis	insectivore	generalist	5	155	150	expansion
Dry Western	Phylloderma.stenops	omnivore	generalist	42	78	36	expansion
Dry Western	Phyllostomus.discolor	omnivore	generalist	143	277	134	expansion
Dry Western	Phyllostomus.hastatus	omnivore	generalist	147	180	33	expansion
Dry Western	Platalina.genovensium	nectarivore	generalist	523	879	356	expansion
Dry Western	Platyrrhinus.brachycephalus	frugivore	generalist	1	5	4	expansion
Dry Western	Platyrrhinus.dorsalis	frugivore	specialist	1	5	4	expansion
Dry Western	Platyrrhinus.helleri	frugivore	generalist	150	303	153	expansion
Dry Western	Platyrrhinus.infuscus	frugivore	generalist	9	423	414	expansion
Dry Western	Pteronotus.davyi	insectivore	generalist	66	69	3	expansion
Dry Western	Pteronotus.gymnonotus	insectivore	generalist	5	23	18	expansion
Dry Western	Rhogeessa.io	insectivore	generalist	33	53	20	expansion
Dry Western	Saccopteryx.canescens	insectivore	generalist	21	57	36	expansion
Dry Western	Saccopteryx.leptura	insectivore	generalist	5	62	57	expansion
Dry Western	Sturnira.ludovici	frugivore	specialist	4	4	0	expansion
Dry Western	Sturnira.oporaphilum	frugivore	specialist	1	4	3	expansion
Dry Western	Tonatia.saurophila	insectivore	generalist	3	62	59	expansion
Dry Western	Trachops.cirrhosus	carnivore	generalist	50	76	26	expansion
Dry Western	Trinycteris.nicefori	insectivore	generalist	4	62	58	expansion
Dry Western	Uroderma.bilobatum	frugivore	generalist	1	106	105	expansion
Dry Western	Vampyrodes.caraccioli	frugivore	generalist	12	55	43	expansion
Dry Western	Anoura.caudifer	nectarivore	specialist	0	5	5	gain
Dry Western	Anoura.fistulata	nectarivore	specialist	0	5	5	gain
Dry Western	Artibeus.concolor	frugivore	specialist	0	4	4	gain
Dry Western	Artibeus.obscurus	frugivore	generalist	0	32	32	gain
Dry Western	Artibeus.planirostris	frugivore	generalist	0	55	55	gain
Dry Western	Centronycteris.maximiliani	frugivore	specialist	0	3	3	gain
Dry Western	Chiroderma.trinitatum	frugivore	generalist	0	5	5	gain
Dry Western	Cormura.brevirostris	insectivore	specialist	0	5	5	gain
Dry Western	Cynomops.abrasus	insectivore	specialist	0	5	5	gain
Dry Western	Cynomops.milleri	insectivore	specialist	0	5	5	gain
Dry Western	Cynomops.paranus	insectivore	specialist	0	5	5	gain
Dry Western	Cynomops.planirostris	insectivore	specialist	0	5	5	gain
Dry Western	Dermanura.anderseni	frugivore	generalist	0	59	59	gain
Dry Western	Dermanura.bogotensis	frugivore	specialist	0	5	5	gain
Dry Western	Dermanura.glauca	frugivore	generalist	0	62	62	gain
Dry Western	Dermanura.gnoma	frugivore	generalist	0	14	14	gain
Dry Western	Dermanura.watsoni	frugivore	generalist	0	38	38	gain
Dry Western	Diaemus.youngi	sanguivore	generalist	0	62	62	gain
Dry Western	Diclidurus.scutatus	insectivore	generalist	0	2	2	gain
Dry Western	Eptesicus.chiriquinus	insectivore	specialist	0	5	5	gain
Dry Western	Eumops.glaucinus	insectivore	generalist	0	55	55	gain
Dry Western	Eumops.maurus	insectivore	generalist	0	17	17	gain
Dry Western	Eumops.perotis	insectivore	generalist	0	13	13	gain
Dry Western	Eumops.trumbulli	insectivore	generalist	0	5	5	gain
Dry Western	Furipterus.horrens	insectivore	generalist	0	5	5	gain
Dry Western	Glossophaga.longirostris	nectarivore	generalist	0	159	159	gain
Dry Western	Glyphonycteris.behnii	insectivore	generalist	0	14	14	gain
Dry Western	Glyphonycteris.daviesi	insectivore	specialist	0	4	4	gain
Dry Western	Glyphonycteris.sylvestris	insectivore	generalist	0	5	5	gain
Dry Western	Histiotus.humboldti	insectivore	specialist	0	5	5	gain
Dry Western	Histiotus.macrotus	insectivore	generalist	0	528	528	gain
Dry Western	Lampronycteris.brachyotis	omnivore	generalist	0	2	2	gain
Dry Western	Lichonycteris.degener	nectarivore	specialist	0	5	5	gain
Dry Western	Lophostoma.carrikeri	insectivore	generalist	0	5	5	gain
Dry Western	Lophostoma.silvicolum	insectivore	specialist	0	5	5	gain
Dry Western	Micronycteris.brosseti	insectivore	specialist	0	3	3	gain
Dry Western	Micronycteris.microtis	insectivore	generalist	0	24	24	gain
Dry Western	Micronycteris.schmidtorum	insectivore	specialist	0	5	5	gain
Dry Western	Mimon.bennettii	insectivore	generalist	0	160	160	gain
Dry Western	Mimon.cozumelae	insectivore	generalist	0	4	4	gain
Dry Western	Molossops.temminckii	insectivore	generalist	0	59	59	gain
Dry Western	Molossus.coibensis	insectivore	generalist	0	54	54	gain
Dry Western	Molossus.pretiosus	insectivore	generalist	0	36	36	gain
Dry Western	Myotis.simus	insectivore	specialist	0	5	5	gain
Dry Western	Noctilio.albiventris	insectivore	generalist	0	162	162	gain
Dry Western	Peropteryx.leucoptera	insectivore	generalist	0	3	3	gain
Dry Western	Phyllostomus.elongatus	omnivore	generalist	0	5	5	gain
Dry Western	Platyrrhinus.albericoi	frugivore	specialist	0	5	5	gain
Dry Western	Platyrrhinus.incarum	frugivore	specialist	0	5	5	gain
Dry Western	Platyrrhinus.masu	frugivore	specialist	0	5	5	gain
Dry Western	Platyrrhinus.vittatus	frugivore	specialist	0	5	5	gain
Dry Western	Pteronotus.rubiginosus	insectivore	specialist	0	5	5	gain
Dry Western	Rhinophylla.fischerae	insectivore	specialist	0	5	5	gain
Dry Western	Scleronycteris.ega	nectarivore	generalist	0	15	15	gain
Dry Western	Sphaeronycteris.toxophyllum	frugivore	specialist	0	5	5	gain
Dry Western	Sturnira.aratathomasi	frugivore	specialist	0	3	3	gain
Dry Western	Thyroptera.discifera	insectivore	generalist	0	40	40	gain
Dry Western	Thyroptera.tricolor	insectivore	generalist	0	71	71	gain
Dry Western	Uroderma.magnirostrum	frugivore	specialist	0	5	5	gain
Dry Western	Vampyressa.melissa	frugivore	specialist	0	5	5	gain
Dry Western	Vampyrodes.major	frugivore	generalist	0	37	37	gain

## Sheet: Mesoamerica
Bio region	Species	Feeding Habits	Land cover	Present	Future	Projections	Forecasted
Mesoamerica	Ametrida.centurio	frugivore	specialist	15	3	-12	contraction
Mesoamerica	Anoura.geoffroyi	nectarivore	generalist	1713	1618	-95	contraction
Mesoamerica	Artibeus.jamaicensis	frugivore	generalist	2312	2122	-190	contraction
Mesoamerica	Artibeus.lituratus	frugivore	generalist	2333	1887	-446	contraction
Mesoamerica	Carollia.perspicillata	frugivore	generalist	979	395	-584	contraction
Mesoamerica	Centronycteris.centralis	insectivore	specialist	400	192	-208	contraction
Mesoamerica	Centurio.senex	frugivore	generalist	2407	1678	-729	contraction
Mesoamerica	Chiroderma.salvini	frugivore	generalist	1168	591	-577	contraction
Mesoamerica	Chiroderma.trinitatum	frugivore	generalist	68	20	-48	contraction
Mesoamerica	Chiroderma.villosum	frugivore	specialist	601	163	-438	contraction
Mesoamerica	Choeroniscus.godmani	nectarivore	generalist	972	593	-379	contraction
Mesoamerica	Chrotopterus.auritus	carnivore	generalist	1764	1745	-19	contraction
Mesoamerica	Cormura.brevirostris	insectivore	specialist	161	65	-96	contraction
Mesoamerica	Dermanura.phaeotis	frugivore	generalist	1453	961	-492	contraction
Mesoamerica	Dermanura.watsoni	frugivore	generalist	698	340	-358	contraction
Mesoamerica	Desmodus.rotundus	sanguivore	generalist	1412	1294	-118	contraction
Mesoamerica	Diclidurus.albus	insectivore	generalist	1416	1272	-144	contraction
Mesoamerica	Diphylla.ecaudata	sanguivore	generalist	1731	1105	-626	contraction
Mesoamerica	Enchisthenes.hartii	frugivore	specialist	503	207	-296	contraction
Mesoamerica	Eptesicus.brasiliensis	insectivore	specialist	282	165	-117	contraction
Mesoamerica	Furipterus.horrens	insectivore	generalist	172	74	-98	contraction
Mesoamerica	Glossophaga.commissarisi	nectarivore	specialist	508	168	-340	contraction
Mesoamerica	Glossophaga.soricina	nectarivore	generalist	3567	2630	-937	contraction
Mesoamerica	Glyphonycteris.sylvestris	insectivore	generalist	288	101	-187	contraction
Mesoamerica	Lampronycteris.brachyotis	omnivore	generalist	367	141	-226	contraction
Mesoamerica	Lichonycteris.obscura	nectarivore	generalist	695	543	-152	contraction
Mesoamerica	Lophostoma.brasiliense	insectivore	generalist	895	744	-151	contraction
Mesoamerica	Lophostoma.silvicolum	insectivore	specialist	188	76	-112	contraction
Mesoamerica	Macrophyllum.macrophyllum	insectivore	specialist	508	317	-191	contraction
Mesoamerica	Mesophylla.macconnelli	frugivore	specialist	120	45	-75	contraction
Mesoamerica	Micronycteris.microtis	insectivore	generalist	1155	406	-749	contraction
Mesoamerica	Micronycteris.schmidtorum	insectivore	specialist	568	206	-362	contraction
Mesoamerica	Mimon.cozumelae	insectivore	generalist	504	185	-319	contraction
Mesoamerica	Molossus.bondae	insectivore	generalist	218	119	-99	contraction
Mesoamerica	Molossus.sinaloae	insectivore	generalist	1672	838	-834	contraction
Mesoamerica	Mormoops.megalophylla	insectivore	generalist	1438	556	-882	contraction
Mesoamerica	Myotis.keaysi	insectivore	specialist	511	232	-279	contraction
Mesoamerica	Myotis.riparius	insectivore	specialist	323	165	-158	contraction
Mesoamerica	Natalus.mexicanus	insectivore	generalist	1709	721	-988	contraction
Mesoamerica	Peropteryx.kappleri	insectivore	generalist	492	178	-314	contraction
Mesoamerica	Peropteryx.macrotis	insectivore	generalist	2040	2027	-13	contraction
Mesoamerica	Phylloderma.stenops	omnivore	generalist	378	301	-77	contraction
Mesoamerica	Phyllostomus.discolor	omnivore	generalist	1486	1320	-166	contraction
Mesoamerica	Platyrrhinus.helleri	frugivore	generalist	1367	899	-468	contraction
Mesoamerica	Platyrrhinus.vittatus	frugivore	specialist	68	62	-6	contraction
Mesoamerica	Promops.centralis	insectivore	specialist	662	293	-369	contraction
Mesoamerica	Pteronotus.davyi	insectivore	generalist	1211	342	-869	contraction
Mesoamerica	Pteronotus.gymnonotus	insectivore	generalist	703	173	-530	contraction
Mesoamerica	Pteronotus.personatus	insectivore	generalist	1766	361	-1405	contraction
Mesoamerica	Pteronotus.rubiginosus	insectivore	specialist	249	44	-205	contraction
Mesoamerica	Rhynchonycteris.naso	insectivore	generalist	529	162	-367	contraction
Mesoamerica	Saccopteryx.bilineata	insectivore	generalist	1014	348	-666	contraction
Mesoamerica	Sturnira.luisi	frugivore	specialist	73	65	-8	contraction
Mesoamerica	Thyroptera.tricolor	insectivore	generalist	389	300	-89	contraction
Mesoamerica	Trachops.cirrhosus	carnivore	generalist	1295	1042	-253	contraction
Mesoamerica	Vampyressa.thyone	frugivore	specialist	504	197	-307	contraction
Mesoamerica	Vampyriscus.nymphaea	frugivore	specialist	81	39	-42	contraction
Mesoamerica	Vampyrodes.major	frugivore	generalist	967	396	-571	contraction
Mesoamerica	Vampyrum.spectrum	carnivore	specialist	447	171	-276	contraction
Mesoamerica	Anoura.cultrata	nectarivore	generalist	90	188	98	expansion
Mesoamerica	Carollia.brevicauda	frugivore	generalist	105	753	648	expansion
Mesoamerica	Carollia.castanea	frugivore	generalist	556	626	70	expansion
Mesoamerica	Cynomops.planirostris	insectivore	specialist	28	42	14	expansion
Mesoamerica	Cyttarops.alecto	insectivore	generalist	4	30	26	expansion
Mesoamerica	Dermanura.tolteca	frugivore	generalist	1361	1382	21	expansion
Mesoamerica	Diaemus.youngi	sanguivore	generalist	630	1600	970	expansion
Mesoamerica	Eptesicus.chiriquinus	insectivore	specialist	53	68	15	expansion
Mesoamerica	Eptesicus.furinalis	insectivore	generalist	2164	2349	185	expansion
Mesoamerica	Eptesicus.fuscus	insectivore	generalist	1298	1617	319	expansion
Mesoamerica	Eumops.auripendulus	insectivore	generalist	1958	2705	747	expansion
Mesoamerica	Eumops.hansae	insectivore	generalist	25	157	132	expansion
Mesoamerica	Eumops.nanus	insectivore	generalist	57	504	447	expansion
Mesoamerica	Eumops.perotis	insectivore	generalist	358	603	245	expansion
Mesoamerica	Gardnerycteris.crenulatum	insectivore	generalist	529	910	381	expansion
Mesoamerica	Lasiurus.blossevillii	insectivore	generalist	2946	4173	1227	expansion
Mesoamerica	Lasiurus.cinereus	insectivore	generalist	809	1673	864	expansion
Mesoamerica	Lasiurus.ega	insectivore	generalist	1958	1959	1	expansion
Mesoamerica	Lonchophylla.concava	nectarivore	generalist	108	324	216	expansion
Mesoamerica	Lonchophylla.robusta	nectarivore	generalist	184	202	18	expansion
Mesoamerica	Lonchophylla.thomasi	nectarivore	generalist	2	372	370	expansion
Mesoamerica	Lonchorhina.aurita	insectivore	generalist	897	973	76	expansion
Mesoamerica	Micronycteris.hirsuta	insectivore	generalist	473	499	26	expansion
Mesoamerica	Micronycteris.minuta	insectivore	generalist	556	972	416	expansion
Mesoamerica	Mimon.bennettii	insectivore	generalist	3	188	185	expansion
Mesoamerica	Molossus.aztecus	insectivore	generalist	16	426	410	expansion
Mesoamerica	Molossus.coibensis	insectivore	generalist	289	351	62	expansion
Mesoamerica	Molossus.molossus	insectivore	generalist	1641	2350	709	expansion
Mesoamerica	Molossus.pretiosus	insectivore	generalist	124	374	250	expansion
Mesoamerica	Molossus.rufus	insectivore	generalist	2616	3199	583	expansion
Mesoamerica	Myotis.albescens	insectivore	generalist	900	1887	987	expansion
Mesoamerica	Myotis.nigricans	insectivore	generalist	2067	3236	1169	expansion
Mesoamerica	Myotis.oxyotus	insectivore	generalist	45	389	344	expansion
Mesoamerica	Noctilio.albiventris	insectivore	generalist	1219	2208	989	expansion
Mesoamerica	Noctilio.leporinus	piscivore	generalist	2870	3482	612	expansion
Mesoamerica	Nyctinomops.aurispinosus	insectivore	generalist	348	766	418	expansion
Mesoamerica	Nyctinomops.laticaudatus	insectivore	generalist	1414	2150	736	expansion
Mesoamerica	Nyctinomops.macrotis	insectivore	generalist	918	2336	1418	expansion
Mesoamerica	Phyllostomus.hastatus	omnivore	generalist	856	1506	650	expansion
Mesoamerica	Rhogeessa.io	insectivore	generalist	461	480	19	expansion
Mesoamerica	Saccopteryx.leptura	insectivore	generalist	873	931	58	expansion
Mesoamerica	Tadarida.brasiliensis	insectivore	generalist	2087	2451	364	expansion
Mesoamerica	Thyroptera.discifera	insectivore	generalist	142	261	119	expansion
Mesoamerica	Tonatia.saurophila	insectivore	generalist	350	604	254	expansion
Mesoamerica	Trinycteris.nicefori	insectivore	generalist	263	598	335	expansion
Mesoamerica	Uroderma.magnirostrum	frugivore	specialist	71	72	1	expansion
Mesoamerica	Anoura.caudifer	nectarivore	specialist	0	3	3	gain
Mesoamerica	Artibeus.obscurus	frugivore	generalist	0	1	1	gain
Mesoamerica	Artibeus.planirostris	frugivore	generalist	0	541	541	gain
Mesoamerica	Choeroniscus.minor	nectarivore	generalist	0	708	708	gain
Mesoamerica	Cynomops.abrasus	insectivore	specialist	0	3	3	gain
Mesoamerica	Cynomops.greenhalli	insectivore	generalist	0	315	315	gain
Mesoamerica	Dermanura.anderseni	frugivore	generalist	0	34	34	gain
Mesoamerica	Dermanura.cinerea	frugivore	generalist	0	107	107	gain
Mesoamerica	Dermanura.glauca	frugivore	generalist	0	587	587	gain
Mesoamerica	Dermanura.gnoma	frugivore	generalist	0	609	609	gain
Mesoamerica	Dermanura.rava	frugivore	specialist	0	3	3	gain
Mesoamerica	Diclidurus.scutatus	insectivore	generalist	0	1	1	gain
Mesoamerica	Eumops.dabbenei	insectivore	generalist	0	59	59	gain
Mesoamerica	Eumops.glaucinus	insectivore	generalist	0	521	521	gain
Mesoamerica	Eumops.maurus	insectivore	generalist	0	115	115	gain
Mesoamerica	Lasiurus.egregius	insectivore	specialist	0	3	3	gain
Mesoamerica	Leptonycteris.curasoae	nectarivore	generalist	0	3	3	gain
Mesoamerica	Lionycteris.spurrelli	nectarivore	generalist	0	513	513	gain
Mesoamerica	Micronycteris.megalotis	insectivore	generalist	0	588	588	gain
Mesoamerica	Molossops.temminckii	insectivore	generalist	0	593	593	gain
Mesoamerica	Natalus.tumidirostris	insectivore	generalist	0	111	111	gain
Mesoamerica	Platyrrhinus.angustirostris	frugivore	specialist	0	3	3	gain
Mesoamerica	Platyrrhinus.dorsalis	frugivore	specialist	0	3	3	gain
Mesoamerica	Saccopteryx.canescens	insectivore	generalist	0	452	452	gain
Mesoamerica	Sphaeronycteris.toxophyllum	frugivore	generalist	0	3	3	gain
Mesoamerica	Sturnira.ludovici	frugivore	specialist	0	3	3	gain
Mesoamerica	Uroderma.bilobatum	frugivore	generalist	0	729	729	gain
Mesoamerica	Vampyrodes.caraccioli	frugivore	generalist	0	479	479	gain

## Sheet: Montane grasslands Andes
Bio region	Species	Feeding Habits	Land cover	Present	Future	Projections	Forecasted
Andean grasslands	Anoura.aequatoris	nectarivore	specialist	14	0	-14	extinct
Andean grasslands	Anoura.fistulata	nectarivore	specialist	1	0	-1	extinct
Andean grasslands	Artibeus.aequatorialis	frugivore	specialist	7	0	-7	extinct
Andean grasslands	Artibeus.fraterculus	frugivore	generalist	3	0	-3	extinct
Andean grasslands	Carollia.manu	frugivore	specialist	2	0	-2	extinct
Andean grasslands	Chiroderma.trinitatum	frugivore	generalist	2	0	-2	extinct
Andean grasslands	Dermanura.bogotensis	frugivore	specialist	7	0	-7	extinct
Andean grasslands	Dermanura.rava	frugivore	specialist	1	0	-1	extinct
Andean grasslands	Histiotus.laephotis	insectivore	specialist	13	0	-13	extinct
Andean grasslands	Lasiurus.egregius	insectivore	specialist	13	0	-13	extinct
Andean grasslands	Lasiurus.salinae	insectivore	generalist	17	0	-17	extinct
Andean grasslands	Platyrrhinus.angustirostris	frugivore	specialist	9	0	-9	extinct
Andean grasslands	Platyrrhinus.incarum	frugivore	specialist	7	0	-7	extinct
Andean grasslands	Platyrrhinus.lineatus	frugivore	specialist	10	0	-10	extinct
Andean grasslands	Platyrrhinus.nigellus	frugivore	specialist	20	0	-20	extinct
Andean grasslands	Rhinophylla.pumilio	frugivore	specialist	14	0	-14	extinct
Andean grasslands	Sturnira.aratathomasi	frugivore	specialist	3	0	-3	extinct
Andean grasslands	Sturnira.luisi	frugivore	specialist	1	0	-1	extinct
Andean grasslands	Sturnira.magna	frugivore	specialist	15	0	-15	extinct
Andean grasslands	Sturnira.oporaphilum	frugivore	specialist	22	0	-22	extinct
Andean grasslands	Vampyressa.melissa	frugivore	specialist	3	0	-3	extinct
Andean grasslands	Anoura.caudifer	nectarivore	specialist	21	1	-20	contraction
Andean grasslands	Anoura.luismanueli	nectarivore	generalist	9	2	-7	contraction
Andean grasslands	Artibeus.amplus	frugivore	specialist	13	1	-12	contraction
Andean grasslands	Artibeus.lituratus	frugivore	generalist	34	23	-11	contraction
Andean grasslands	Carollia.castanea	frugivore	generalist	25	17	-8	contraction
Andean grasslands	Carollia.perspicillata	frugivore	generalist	35	6	-29	contraction
Andean grasslands	Centronycteris.centralis	insectivore	specialist	23	1	-22	contraction
Andean grasslands	Centurio.senex	frugivore	generalist	6	3	-3	contraction
Andean grasslands	Chiroderma.salvini	frugivore	generalist	582	481	-101	contraction
Andean grasslands	Chiroderma.villosum	frugivore	specialist	8	1	-7	contraction
Andean grasslands	Choeroniscus.godmani	nectarivore	generalist	14	10	-4	contraction
Andean grasslands	Cynomops.greenhalli	insectivore	generalist	19	17	-2	contraction
Andean grasslands	Dermanura.phaeotis	frugivore	generalist	24	15	-9	contraction
Andean grasslands	Desmodus.rotundus	sanguivore	generalist	1694	1680	-14	contraction
Andean grasslands	Diclidurus.albus	insectivore	generalist	22	17	-5	contraction
Andean grasslands	Enchisthenes.hartii	frugivore	specialist	32	1	-31	contraction
Andean grasslands	Eptesicus.brasiliensis	insectivore	specialist	32	1	-31	contraction
Andean grasslands	Eptesicus.chiriquinus	insectivore	specialist	3	1	-2	contraction
Andean grasslands	Eptesicus.furinalis	insectivore	generalist	49	26	-23	contraction
Andean grasslands	Eumops.dabbenei	insectivore	generalist	10	6	-4	contraction
Andean grasslands	Eumops.patagonicus	insectivore	generalist	12	5	-7	contraction
Andean grasslands	Furipterus.horrens	insectivore	generalist	16	2	-14	contraction
Andean grasslands	Glossophaga.commissarisi	nectarivore	specialist	25	1	-24	contraction
Andean grasslands	Histiotus.humboldti	insectivore	specialist	8	1	-7	contraction
Andean grasslands	Histiotus.velatus	insectivore	generalist	11	7	-4	contraction
Andean grasslands	Leptonycteris.curasoae	nectarivore	generalist	11	1	-10	contraction
Andean grasslands	Lichonycteris.degener	nectarivore	specialist	10	1	-9	contraction
Andean grasslands	Lonchophylla.orienticollina	nectarivore	specialist	10	1	-9	contraction
Andean grasslands	Lonchophylla.robusta	nectarivore	generalist	26	18	-8	contraction
Andean grasslands	Lonchophylla.thomasi	nectarivore	generalist	36	27	-9	contraction
Andean grasslands	Lonchorhina.aurita	insectivore	generalist	27	19	-8	contraction
Andean grasslands	Lophostoma.silvicolum	insectivore	specialist	3	1	-2	contraction
Andean grasslands	Macrophyllum.macrophyllum	insectivore	specialist	31	1	-30	contraction
Andean grasslands	Mesophylla.macconnelli	frugivore	specialist	26	1	-25	contraction
Andean grasslands	Micronycteris.hirsuta	insectivore	generalist	25	17	-8	contraction
Andean grasslands	Micronycteris.megalotis	insectivore	generalist	27	24	-3	contraction
Andean grasslands	Micronycteris.minuta	insectivore	generalist	21	20	-1	contraction
Andean grasslands	Micronycteris.schmidtorum	insectivore	specialist	11	1	-10	contraction
Andean grasslands	Mimon.cozumelae	insectivore	generalist	3	1	-2	contraction
Andean grasslands	Molossops.temminckii	insectivore	generalist	7	6	-1	contraction
Andean grasslands	Molossus.bondae	insectivore	generalist	99	58	-41	contraction
Andean grasslands	Molossus.molossus	insectivore	generalist	47	25	-22	contraction
Andean grasslands	Molossus.sinaloae	insectivore	generalist	5	4	-1	contraction
Andean grasslands	Mormoops.megalophylla	insectivore	generalist	4	1	-3	contraction
Andean grasslands	Myotis.albescens	insectivore	generalist	36	23	-13	contraction
Andean grasslands	Myotis.dinellii	insectivore	generalist	14	5	-9	contraction
Andean grasslands	Myotis.keaysi	insectivore	specialist	33	1	-32	contraction
Andean grasslands	Myotis.oxyotus	insectivore	generalist	40	21	-19	contraction
Andean grasslands	Myotis.riparius	insectivore	specialist	34	1	-33	contraction
Andean grasslands	Natalus.tumidirostris	insectivore	generalist	6	4	-2	contraction
Andean grasslands	Nyctinomops.laticaudatus	insectivore	generalist	24	23	-1	contraction
Andean grasslands	Nyctinomops.macrotis	insectivore	generalist	13	6	-7	contraction
Andean grasslands	Peropteryx.kappleri	insectivore	generalist	24	2	-22	contraction
Andean grasslands	Phyllostomus.elongatus	omnivore	generalist	10	3	-7	contraction
Andean grasslands	Platyrrhinus.albericoi	frugivore	specialist	2	1	-1	contraction
Andean grasslands	Platyrrhinus.brachycephalus	frugivore	generalist	4	2	-2	contraction
Andean grasslands	Platyrrhinus.dorsalis	frugivore	specialist	18	1	-17	contraction
Andean grasslands	Platyrrhinus.vittatus	frugivore	specialist	6	1	-5	contraction
Andean grasslands	Promops.centralis	insectivore	specialist	34	1	-33	contraction
Andean grasslands	Pteronotus.davyi	insectivore	generalist	11	1	-10	contraction
Andean grasslands	Pygoderma.bilabiatum	frugivore	generalist	7	5	-2	contraction
Andean grasslands	Rhinophylla.fischerae	frugivore	specialist	14	1	-13	contraction
Andean grasslands	Rhogeessa.minutilla	insectivore	generalist	29	21	-8	contraction
Andean grasslands	Rhynchonycteris.naso	insectivore	generalist	18	2	-16	contraction
Andean grasslands	Saccopteryx.bilineata	insectivore	generalist	24	6	-18	contraction
Andean grasslands	Saccopteryx.canescens	insectivore	generalist	24	18	-6	contraction
Andean grasslands	Saccopteryx.leptura	insectivore	generalist	30	18	-12	contraction
Andean grasslands	Sphaeronycteris.toxophyllum	frugivore	specialist	5	1	-4	contraction
Andean grasslands	Sturnira.bidens	frugivore	specialist	24	1	-23	contraction
Andean grasslands	Sturnira.bogotensis	frugivore	specialist	22	1	-21	contraction
Andean grasslands	Sturnira.erythromos	frugivore	specialist	37	1	-36	contraction
Andean grasslands	Sturnira.ludovici	frugivore	specialist	21	1	-20	contraction
Andean grasslands	Sturnira.tildae	frugivore	specialist	4	1	-3	contraction
Andean grasslands	Tadarida.brasiliensis	insectivore	generalist	2002	1970	-32	contraction
Andean grasslands	Uroderma.magnirostrum	frugivore	specialist	16	1	-15	contraction
Andean grasslands	Vampyressa.thyone	frugivore	specialist	27	1	-26	contraction
Andean grasslands	Vampyriscus.bidens	frugivore	specialist	19	1	-18	contraction
Andean grasslands	Vampyrum.spectrum	carnivore	specialist	31	1	-30	contraction
Andean grasslands	Ametrida.centurio	frugivore	specialist	1	1	0	stable
Andean grasslands	Glyphonycteris.sylvestris	insectivore	generalist	1	1	0	stable
Andean grasslands	Anoura.cultrata	nectarivore	generalist	33	1261	1228	expansion
Andean grasslands	Anoura.geoffroyi	nectarivore	generalist	137	522	385	expansion
Andean grasslands	Anoura.latidens	nectarivore	generalist	17	614	597	expansion
Andean grasslands	Anoura.peruana	nectarivore	generalist	766	2092	1326	expansion
Andean grasslands	Artibeus.jamaicensis	frugivore	generalist	1	3	2	expansion
Andean grasslands	Artibeus.obscurus	frugivore	generalist	3	47	44	expansion
Andean grasslands	Carollia.brevicauda	frugivore	generalist	157	298	141	expansion
Andean grasslands	Choeroniscus.minor	nectarivore	generalist	15	112	97	expansion
Andean grasslands	Chrotopterus.auritus	carnivore	generalist	4	24	20	expansion
Andean grasslands	Dermanura.anderseni	frugivore	generalist	4	16	12	expansion
Andean grasslands	Dermanura.glauca	frugivore	generalist	1	18	17	expansion
Andean grasslands	Diaemus.youngi	sanguivore	generalist	18	20	2	expansion
Andean grasslands	Diphylla.ecaudata	sanguivore	generalist	373	615	242	expansion
Andean grasslands	Eptesicus.diminutus	insectivore	generalist	2	5	3	expansion
Andean grasslands	Eumops.auripendulus	insectivore	generalist	163	410	247	expansion
Andean grasslands	Eumops.glaucinus	insectivore	generalist	9	11	2	expansion
Andean grasslands	Eumops.hansae	insectivore	generalist	29	178	149	expansion
Andean grasslands	Eumops.perotis	insectivore	generalist	87	230	143	expansion
Andean grasslands	Gardnerycteris.crenulatum	insectivore	generalist	166	361	195	expansion
Andean grasslands	Glossophaga.longirostris	nectarivore	generalist	45	97	52	expansion
Andean grasslands	Glossophaga.soricina	nectarivore	generalist	385	790	405	expansion
Andean grasslands	Glyphonycteris.behnii	insectivore	generalist	24	266	242	expansion
Andean grasslands	Histiotus.macrotus	insectivore	generalist	223	1828	1605	expansion
Andean grasslands	Histiotus.montanus	insectivore	generalist	1135	1977	842	expansion
Andean grasslands	Lasiurus.blossevillii	insectivore	generalist	18	41	23	expansion
Andean grasslands	Lasiurus.cinereus	insectivore	generalist	378	786	408	expansion
Andean grasslands	Lichonycteris.obscura	nectarivore	generalist	9	16	7	expansion
Andean grasslands	Lionycteris.spurrelli	nectarivore	generalist	172	532	360	expansion
Andean grasslands	Lonchophylla.concava	nectarivore	generalist	4	16	12	expansion
Andean grasslands	Lonchorhina.orinocensis	insectivore	generalist	1	5	4	expansion
Andean grasslands	Lophostoma.brasiliense	insectivore	generalist	104	322	218	expansion
Andean grasslands	Mimon.bennettii	insectivore	generalist	33	37	4	expansion
Andean grasslands	Molossus.coibensis	insectivore	generalist	12	17	5	expansion
Andean grasslands	Molossus.pretiosus	insectivore	generalist	16	18	2	expansion
Andean grasslands	Molossus.rufus	insectivore	generalist	138	352	214	expansion
Andean grasslands	Mormopterus.kalinowskii	insectivore	generalist	265	1608	1343	expansion
Andean grasslands	Myotis.chiloensis	insectivore	generalist	4	232	228	expansion
Andean grasslands	Myotis.nigricans	insectivore	generalist	142	427	285	expansion
Andean grasslands	Noctilio.albiventris	insectivore	generalist	55	295	240	expansion
Andean grasslands	Noctilio.leporinus	piscivore	generalist	139	594	455	expansion
Andean grasslands	Nyctinomops.aurispinosus	insectivore	generalist	53	1547	1494	expansion
Andean grasslands	Peropteryx.macrotis	insectivore	generalist	108	251	143	expansion
Andean grasslands	Phylloderma.stenops	omnivore	generalist	136	395	259	expansion
Andean grasslands	Phyllostomus.discolor	omnivore	generalist	94	121	27	expansion
Andean grasslands	Phyllostomus.hastatus	omnivore	generalist	236	524	288	expansion
Andean grasslands	Platalina.genovensium	nectarivore	generalist	194	1327	1133	expansion
Andean grasslands	Platyrrhinus.helleri	frugivore	generalist	553	714	161	expansion
Andean grasslands	Platyrrhinus.infuscus	frugivore	generalist	30	1263	1233	expansion
Andean grasslands	Pteronotus.gymnonotus	insectivore	generalist	11	20	9	expansion
Andean grasslands	Pteronotus.personatus	insectivore	generalist	8	38	30	expansion
Andean grasslands	Rhogeessa.io	insectivore	generalist	10	15	5	expansion
Andean grasslands	Thyroptera.discifera	insectivore	generalist	14	15	1	expansion
Andean grasslands	Thyroptera.tricolor	insectivore	generalist	9	168	159	expansion
Andean grasslands	Tonatia.saurophila	insectivore	generalist	9	16	7	expansion
Andean grasslands	Trachops.cirrhosus	carnivore	generalist	22	24	2	expansion
Andean grasslands	Trinycteris.nicefori	insectivore	generalist	15	18	3	expansion
Andean grasslands	Uroderma.bilobatum	frugivore	generalist	8	117	109	expansion
Andean grasslands	Vampyrodes.caraccioli	frugivore	generalist	17	18	1	expansion
Andean grasslands	Vampyrodes.major	frugivore	generalist	5	13	8	expansion
Andean grasslands	Cormura.brevirostris	insectivore	specialist	0	1	1	gain
Andean grasslands	Dermanura.cinerea	frugivore	generalist	0	21	21	gain
Andean grasslands	Diclidurus.scutatus	insectivore	generalist	0	8	8	gain
Andean grasslands	Eumops.maurus	insectivore	generalist	0	56	56	gain
Andean grasslands	Lasiurus.ega	insectivore	generalist	0	2	2	gain
Andean grasslands	Micronycteris.microtis	insectivore	generalist	0	4	4	gain
Andean grasslands	Platyrrhinus.ismaeli	frugivore	generalist	0	6	6	gain
Andean grasslands	Scleronycteris.ega	nectarivore	generalist	0	4	4	gain

## Sheet: Patagonian steppe
Bio region	Species	Feeding Habits	Land cover	Present	Future	Projections	Forecasted
Patagonian	Artibeus.fimbriatus	frugivore	specialist	5	0	-5	extinct
Patagonian	Carollia.perspicillata	frugivore	generalist	2	0	-2	extinct
Patagonian	Myotis.levis	insectivore	specialist	20	0	-20	extinct
Patagonian	Myotis.riparius	insectivore	specialist	5	0	-5	extinct
Patagonian	Myotis.ruber	insectivore	specialist	6	0	-6	extinct
Patagonian	Platyrrhinus.lineatus	frugivore	specialist	7	0	-7	extinct
Patagonian	Sturnira.lilium	frugivore	specialist	10	0	-10	extinct
Patagonian	Desmodus.rotundus	sanguivore	generalist	425	206	-219	contraction
Patagonian	Eumops.perotis	insectivore	generalist	199	121	-78	contraction
Patagonian	Myotis.albescens	insectivore	generalist	8	6	-2	contraction
Patagonian	Eptesicus.diminutus	insectivore	generalist	421	1492	1071	expansion
Patagonian	Eptesicus.furinalis	insectivore	generalist	396	571	175	expansion
Patagonian	Eumops.auripendulus	insectivore	generalist	9	30	21	expansion
Patagonian	Eumops.bonariensis	insectivore	generalist	380	824	444	expansion
Patagonian	Eumops.dabbenei	insectivore	generalist	11	621	610	expansion
Patagonian	Eumops.patagonicus	insectivore	generalist	874	1493	619	expansion
Patagonian	Histiotus.macrotus	insectivore	generalist	72	163	91	expansion
Patagonian	Histiotus.montanus	insectivore	generalist	1662	3121	1459	expansion
Patagonian	Lasiurus.blossevillii	insectivore	generalist	532	825	293	expansion
Patagonian	Lasiurus.cinereus	insectivore	generalist	2588	3276	688	expansion
Patagonian	Lasiurus.ega	insectivore	generalist	462	729	267	expansion
Patagonian	Lasiurus.salinae	insectivore	specialist	149	201	52	expansion
Patagonian	Molossops.temminckii	insectivore	generalist	681	1002	321	expansion
Patagonian	Molossus.molossus	insectivore	generalist	50	134	84	expansion
Patagonian	Molossus.rufus	insectivore	generalist	20	294	274	expansion
Patagonian	Myotis.dinellii	insectivore	generalist	507	1469	962	expansion
Patagonian	Myotis.nigricans	insectivore	generalist	23	101	78	expansion
Patagonian	Noctilio.leporinus	piscivore	generalist	33	98	65	expansion
Patagonian	Pygoderma.bilabiatum	frugivore	generalist	4	5	1	expansion
Patagonian	Tadarida.brasiliensis	insectivore	generalist	2856	3052	196	expansion
Patagonian	Artibeus.lituratus	frugivore	specialist	0	5	5	gain
Patagonian	Artibeus.obscurus	frugivore	generalist	0	2	2	gain
Patagonian	Chiroderma.doriae	frugivore	generalist	0	5	5	gain
Patagonian	Chrotopterus.auritus	carnivore	generalist	0	5	5	gain
Patagonian	Diphylla.ecaudata	sanguivore	generalist	0	1	1	gain
Patagonian	Eumops.glaucinus	insectivore	generalist	0	5	5	gain
Patagonian	Histiotus.velatus	insectivore	generalist	0	5	5	gain
Patagonian	Noctilio.albiventris	insectivore	generalist	0	2	2	gain
Patagonian	Nyctinomops.laticaudatus	insectivore	generalist	0	5	5	gain
Patagonian	Nyctinomops.macrotis	insectivore	generalist	0	5	5	gain
